# Supplementary material for: Effects of education methods on self-efficacy of smoking cessation counseling among medical students
Source: PeerJ journal article supplement (doi:10.7717/peerj.11408), 2021-05-07
Supplement: questionnaire_Eng.pdf [file questionnaire_Eng.pdf]

# Questionnaire

You will soon become a doctor. Am I ready for smoking cessation treatment? We conduct a survey on smoking-related knowledge and education on smoking cessation for medical students in Busan and Gyeongnam area. We need your active interest and participation for better education and improvement of quality in health care.

1. Please select your gender

male

female

2. Please enter your age

(            )

3. Please select your school

Kosin University College of Medicine

Dong-A University College of Medicine

Pusan National University School of Medicine

Inje University College of Medicine

4. Please select your academic year?

Year 1

Year 2

Year 3

Year 4

5. How many cigarettes have you smoked in your lifetime?

<100 cigarettes

more than 100 cigarettes

Never (then, question 11)

6. When did you start smoking?

- ~ high school
- pre-med year 1
- pre-med year 2
- Year 1
- Year 2
- Year 3
- Year 4

7. What type of cigarette do you smoke (or had smoked)? (Multiple choices are possible.)

- Cigarette
- E-cigarette
- Smokeless tobacco (e.g., chewing tobacco, snuff, snus and dip)
- Hookah
- Shag (Rolled tobacco)

8. How many cigarettes, on average, do you smoke per day?

- ① daily (then, question 8-1)
- ② nondaily (then, question 8-2)
- ③ not now (then, question 8-3)

8-1. Daily smoker: How many cigarettes, on average, do you smoke per day?

(                    )

8-2. Nondaily smoker: How many days did you smoke in the last month, and how many on average did you smoke a day on the day you smoked? (e.g., 7 days, 10 cigarettes per day)

(                    )

8-3. Past smoker (then question 11): How long did you smoke in the past, and how many on average did you smoke a day in the past, and what is the duration of smoking cessation? (e.g., 5 years, 20 cigarettes per day, 3 years)

(                    )

9. Do you have an experience of quit attempts?

- Yes
- No



18. Can brief smoking cessation counseling provided by health care providers affect your cessation success?

- Strongly disagree
- Disagree
- Neither agree nor disagree
- Agree
- Strongly agree

19. Please write five major steps to intervention (the "5 As") for clinicians to provide counseling to tobacco users who want to quit.

( \_\_\_\_\_ )

20. What supplements or drugs can be used for smoking cessation? (Please write up to three.)

( \_\_\_\_\_ )

21. How long does it take for the risk of cardiovascular diseases to decrease to a level similar to that of a nonsmoker?

( \_\_\_\_\_ years)

22. Is there benefits of smoking cessation in reducing sudden and premature deaths?

- Strongly disagree
- Disagree
- Neither agree nor disagree
- Agree
- Strongly agree

23. Do you think you can effectively counsel a smoker who needs help to quit smoking?

- Strongly disagree
- Disagree
- Neither agree nor disagree
- Agree
- Strongly agree
