# Supplementary material for: Effects of education methods on self-efficacy of smoking cessation counseling among medical students
Source: PeerJ. 2021 May 7;9:e11408. doi: 10.7717/peerj.11408 (PMC8109004; doi:10.7717/peerj.11408)
Supplement: Supplemental Information 1 [file peerj-09-11408-s001.xlsx]

## Sheet: Sheet1
TIME	sex	age	group	year	평생흡연량	흡연시기	담배종류	현재 흡연량	1일 평균흡연량	최근 1개월간 흡연일수, (흡연한 날) 1일 평균흡연량	과거 흡연기간, 과거 하루 평균 흡연량 및 금연 기간이 어떻게 됩니까?	금연시도경험	금연계획	최근 7일 간접흡연경험	흡연의 해로움 배운 적	금연상담기법 교육 받은 적	한국성인흡연율	15. 한국에서 1년간 흡연으로 인해 사망하는 사람 수	16. 흡연으로 인해 발생할 수 있는 질병	17. 간접흡연으로 인해 뇌졸중이 발생할 수 있습니까?	18. 의료진이 제공하는 간단한 금연 상담이 금연성공에 영향을 줄 수 있습니까?	상담기법 5단계는	20. 금연치료 보조제 혹은 약물은	심혈관질환의 위험이 비흡연자와 유사한 수준으로 감소되는 금연유지기간	22. 금연은 연령에 상관없이 조기사망을 감소시킵니까?	23. 금연을 위해 도움을 필요로하는 흡연자를 능숙하게 상담할 수 있다고 생각합니까?
2016-12-05 00:25:23	여	26	부산대학교	본과 2학년	피운 적 없음 (10번으로)									예	예	예	30		폐암, 백내장, 잇몸질환	예	3
2016-12-05 10:15:37	남	23	부산대학교	본과 1학년	100개비 이상	의대(혹은 의학전문대학원) 입학 이전	궐련 전자담배 무연담배(스누스, 스너프, 씹는 담배 등) 물담배	매일 피움 (7-1번으로)	20			예	현재로서는 전혀 금연할 생각이 없다.	예	예	예	30	1000000	폐암, 구강암, 식도암	예	4	5R, 5A	니코틴패치		아니오	2
2016-12-05 17:58:07	남	26	부산대학교	본과 1학년	피운 적 없음 (10번으로)									예	예	예	0.5	1만명	폐암, 구강암, 식도암	예	3			10년	예	2
2016-12-05 17:58:20	남	26	부산대학교	본과 1학년	피운 적 없음 (10번으로)									예	예	예	0.5	1만명	폐암, 구강암, 식도암	예	3			10년	예	2
2016-12-06 16:33:09	남	27	부산대학교	본과 1학년	100개비 이상	의대(혹은 의학전문대학원) 입학 이전	궐련	매일 피움 (7-1번으로)	6			예	6개월 안에 금연할 계획이 있다.	예	예	예	30	100만	펴암 대장암 뇌졸중	예	3		금연검 패치 심리치료	7	예	3
2016-12-06 16:33:24	남	25	부산대학교	본과 1학년	피운 적 없음 (10번으로)									예	예	예	30	10000	폐암, 후두암, 구강암	예	3		패치, 껌	20	예	3
2016-12-06 16:33:31	여	25	부산대학교	본과 1학년	피운 적 없음 (10번으로)				0			아니오	현재로서는 전혀 금연할 생각이 없다.
2016-12-06 16:34:49	남	23	부산대학교	본과 1학년	100개비 이상	의대(혹은 의학전문대학원) 입학 이전	궐련 전자담배	매일 피움 (7-1번으로)	10			예	6개월 안에 금연할 계획이 있다.	예	예	예	25	1만	암 고혈압 COPD	예	5		니코틴껌	5년	예	5
2016-12-06 16:35:34	남	25	부산대학교	본과 1학년	피운 적 없음 (10번으로)							아니오	현재로서는 전혀 금연할 생각이 없다.	아니오	예	예	30
2016-12-06 16:36:24	여	25	부산대학교	본과 1학년	피운 적 없음 (10번으로)									예	예	예	30%?	10만명?	폐암, COPD, 중독	예	3		은단 패치	10년	아니오	3
2016-12-06 16:37:30	여	25	부산대학교	본과 1학년	피운 적 없음 (10번으로)									예	예	아니오	30	만명	폐암 식도암	예	4			5년	아니오	1
2016-12-06 16:38:50	여	23	부산대학교	본과 1학년	피운 적 없음 (10번으로)							아니오		예	예	아니오			폐암 기관지염 후두암	예	1				예	3
2016-12-06 16:42:34	남	27	부산대학교	본과 4학년	피운 적 없음 (10번으로)									예	예	예	35	100000	폐암 copd 위암	예	3	모르겟습니다	바레니클린 부프로피온	10y	예	3
2016-12-06 16:43:18	남	29	부산대학교	본과 4학년	100개비 이상	본과 1학년	궐련	과거에는 피웠으나 현재 피우지 않음 (7-3번으로)			3년, 하루 1/3갑, 6개월			예	예	아니오	0.15	5만명	copd, 심근경색, 췌장암	예	2	.	varenicline bupropione	2	예	3
2016-12-06 16:44:35	남	32	부산대학교	본과 4학년	피운 적 없음 (10번으로)									예	예	예	30	10000	폐암 COPD 방광암	예	4	5R 5A	챔픽스 니코틴패치	10	예	3
2016-12-06 16:45:34	여	27	부산대학교	본과 2학년	피운 적 없음 (10번으로)									예	예	예	0.3	500만명	폐암, 구감암, 후두암	예	4	잘 기억이 안납니다ㅠㅠ	니코틴패치, 전자담배, 니코틴껌	15년	예	4
2016-12-06 16:45:41	남	29	부산대학교	본과 4학년	피운 적 없음 (10번으로)									예	예	예	40	??	copd. lung cancer. pancreas cancer	예	3		bupropion. 니코틴패치.	5	예	1
2016-12-06 16:46:02	여	27	부산대학교	본과 4학년	피운 적 없음 (10번으로)									예	아니오	예	20	100000	암 심혈관질환 뇌혈관질환	예	3		부프로피온 니코틴패치	10년	예	2
2016-12-06 16:59:50	남	27	부산대학교	본과 2학년	피운 적 없음 (10번으로)									예	예	예
2016-12-06 17:00:11	남	30	부산대학교	본과 2학년	100개비 이상	의대(혹은 의학전문대학원) 입학 이전	궐련	매일 피움 (7-1번으로)	18			아니오	현재로서는 전혀 금연할 생각이 없다.	예	예	예	20	10000	만성폐쇄성폐질환 뇌졸중 폐암	예	1
2016-12-06 17:07:02	남	27	부산대학교	본과 2학년	100개비 이상	의대(혹은 의학전문대학원) 입학 이전	궐련	매일 피움 (7-1번으로)	15			예	현재로서는 전혀 금연할 생각이 없다.	예	예	예	40	100000	암, 심혈관계질환, 만성폐쇄성폐질환	예	3	5A,5R	참픽스, 니코틴패치, 니코틴 껌	20년	예	2
2016-12-06 17:07:21	남	30	부산대학교	본과 2학년	피운 적 없음 (10번으로)									아니오	예	예	40	1만명	폐암 , 심혈관질환, COPD	예	2		바레니클라인 , 부프로피온	20년	예	1
2016-12-06 17:08:34	여	24	부산대학교	본과 2학년	피운 적 없음 (10번으로)									예	예	예	40	100000	폐암. 구강암. COPD	예	4	5R	부프로피온, 참픽스	20년	예	3
2016-12-06 17:10:01	여	24	부산대학교	본과 2학년	피운 적 없음 (10번으로)									예	예	예	0.4	ㅠㅠ모르겠어요	폐암, 만성기관지염, COPD	예	3	고려전단계 고려단계 준비단계 실행단계 유지단계	Benzodiazepine	10년 이상	예	4
2016-12-06 17:28:54	남	31	부산대학교	본과 2학년	100개비 이상	의대(혹은 의학전문대학원) 입학 이전	궐련	매일 피움 (7-1번으로)	17			예	6개월 안에 금연할 계획이 있다.	예	예	예	40	모름	암 뇌졸중 MI	예	4	.	챔픽스 패치	10	예	4
2016-12-06 17:29:03	여	27	부산대학교	본과 2학년	피운 적 없음 (10번으로)									예	예	예	50	5000	폐암,후두암,뇌혈관질환	예	3	Ask-assess-advise-assist-arrange	니코틴패치,champix(varenicline), bupropion	1	예	3
2016-12-06 17:53:17	남	23	동아대학교	본과 1학년	피운 적 없음 (10번으로)									예	예	예	0.3		폐암, 구강암, 식도암	예	2		니코틴 패치	10년	예	2
2016-12-06 17:57:24	남	21	동아대학교	본과 1학년	피운 적 없음 (10번으로)									예	예	아니오	0.25	500명	폐암, 당뇨, 고혈압	예	5		니코틴 패치 니코틴 껌 사탕	10년	아니오	3
2016-12-06 18:41:33	남	25	동아대학교	본과 2학년	피운 적 없음 (10번으로)									예	예	예	0.393		폐암, 골다공증,백내장	예	4	5R's Risk, Relevance, Rewards, Roadblocks, Receptition	니코틴 패치, 니코틴 껌, 부프로피온,		예	3
2016-12-06 19:16:39	남	27	동아대학교	본과 1학년	피운 적 없음 (10번으로)									예	예	아니오	0.4	50만명	폐암	예	5	모르겠어요	금연 패치, 금연 껌	5년이상	예	1
2016-12-06 20:10:31	남	26	부산대학교	본과 2학년	100개비 미만	의대(혹은 의학전문대학원) 입학 이전	궐련	과거에는 피웠으나 현재 피우지 않음 (7-3번으로)			2주, 2개피, 4년			예	예	예	0.3	1만명	폐암, COPD, 후두암	예	5	1) 고려전단계 2) 고려 단계 3) 준비 단계 4) 실행 단계 5) 유지 단계	니코틴 패치, 부프로피온, 바레니클린	5년	예	4
2016-12-06 21:42:25	여	26	부산대학교	본과 1학년	피운 적 없음 (10번으로)									예	예	예	15	500	폐암, 버거씨병, 기관지 후두암	아니오	4	Assist ask advise arrange	니코틴패치	25	예	3
2016-12-06 23:00:47	남	27	부산대학교	본과 1학년	100개비 이상	의대(혹은 의학전문대학원) 입학 이전	궐련	매일 피움 (7-1번으로)	15			아니오	6개월 이내에는 아니지만 언젠가는 금연할 생각이 있다.	예	예	예	30	500	폐암 식도암 구강암	예	2	5A	니코틴 껌 니코틴 패치 무연담배	5년	아니오	3
2016-12-07 14:06:59	남	20	동아대학교	본과 1학년	피운 적 없음 (10번으로)									예	예	아니오	30	5000	폐암. 폐렴,	예	4			3년	아니오	2
2016-12-07 17:45:24	남	26	부산대학교	본과 3학년	100개비 이상	의대(혹은 의학전문대학원) 입학 이전		과거에는 피웠으나 현재 피우지 않음 (7-3번으로)			5년 10개비 3년			아니오	아니오	예	30	1000		예	3				예	3
2016-12-07 17:45:32	남	26	부산대학교	본과 3학년	피운 적 없음 (10번으로)									아니오	예	아니오	40	100만	폐암 폐기종 식도암	예	4	5a	부프로피온 챔픽스	30년	예	5
2016-12-07 17:46:01	남	24	부산대학교	본과 1학년	100개비 이상	의대(혹은 의학전문대학원) 입학 이전	궐련 전자담배 무연담배(스누스, 스너프, 씹는 담배 등) 물담배	매일 피움 (7-1번으로)	20			예	현재로서는 전혀 금연할 생각이 없다.	예	예	예			폐암, 구강암, 식도암	예	4		니코틴		아니오	2
2016-12-07 17:48:01	여	25	부산대학교	본과 3학년	피운 적 없음 (10번으로)				0			아니오		예	예	예	0.6	10만명	심혈관질환 폐암, COPD	예	4	동기부여	부프로피온 껌 은단	10년	예	3
2016-12-07 17:49:48	남	27	부산대학교	본과 1학년	피운 적 없음 (10번으로)				안 핌					예	예	아니오				예	3				예	3
2016-12-07 17:51:48	남	30	부산대학교	본과 2학년	피운 적 없음 (10번으로)							아니오		예	예	예	0.4	만명	폐암 후두암 뇌졸중	예	3	동기부여 계획세우기 실천하기 평가하기 칭찬하기	니코틴 패치	10년	예	3
2016-12-07 17:54:42	여	24	부산대학교	본과 3학년	피운 적 없음 (10번으로)									예	예	예	20	만명	폐암 식도암 구강암	예	3	.	.	20년	예	3
2016-12-07 17:57:04	여	24	부산대학교	본과 1학년	피운 적 없음 (10번으로)									예	예	예			폐암 뇌졸중 식도암	아니오	4				아니오	2
2016-12-07 17:57:38	남	27	부산대학교	본과 1학년	100개비 이상	의대(혹은 의학전문대학원) 입학 이전	궐련	과거에는 피웠으나 현재 피우지 않음 (7-3번으로)			6년, 10개피, 2년			예	예	예	40	?	폐암, 뇌졸중, 심근경색	예	4		니코틴패치	10년	예	3
2016-12-07 17:58:37	여	27	부산대학교	본과 3학년	피운 적 없음 (10번으로)									예	예	예	10	1000	폐암 LC 식도암	예	4	Ask assess advice arrange	Disulfiram Naltrexone Acamp...	20	예	4
2016-12-07 18:01:57	남	26	부산대학교	본과 3학년	피운 적 없음 (10번으로)							아니오		예	예	예	35	60000	폐암 후두암 설암 COPD 버거씨병	예	5	Ask Asess Advise Assist Arrange	니코틴패치/껌 bupropion varenicline	5	예	3
2016-12-07 18:02:38	남	31	부산대학교	본과 1학년	피운 적 없음 (10번으로)									예	예	예	30	50000	폐암 후두암 구강암	예	3	ask advise assess assist arrange	니코틴 패치 니코틴 껌 니코틴 사탕	10년	예	3
2016-12-07 18:05:47	남	26	부산대학교	본과 3학년	100개비 이상	의대(혹은 의학전문대학원) 입학 이전	말아 피우는 담배	매일 피움 (7-1번으로)	10			예	6개월 이내에는 아니지만 언젠가는 금연할 생각이 있다.	예	예	예	0.2	20만명	폐암 식도암 copd	예	4	고려전단계 고려단계 실행단계 유지단계	부스피론 날트렉손	15년	예	3
2016-12-07 18:06:29	남	29	부산대학교	본과 4학년	피운 적 없음 (10번으로)									아니오	예	예	30%??	10000	식도암 구강암 폐암	예	4	Ask Assess Advise Assist Arrange	바레니클린 니코틴패치 부스피론	10년	예	4
2016-12-07 18:09:57	남	28	부산대학교	본과 4학년	피운 적 없음 (10번으로)								현재로서는 전혀 금연할 생각이 없다.	예	예	예	30	10000	폐암 방광암 식도암	예	1	?	부프로피온 니코틴 패치 니코틴 껌	5	예	1
2016-12-07 18:10:03	남	27	부산대학교	본과 4학년	피운 적 없음 (10번으로)									예	예	아니오	70	10만명	폐암 COPD 천식	예	3	5R	바레니클린 니코틴패치 부프로피온	15년	예	3
2016-12-07 18:10:24	여	27	부산대학교	본과 4학년	피운 적 없음 (10번으로)									예	아니오	예	40	4000	폐암 췌장암 간암	예	4		니코틴패치 부프로피온 바레니클린		예	3
2016-12-07 18:10:33	남	30	부산대학교	본과 4학년	피운 적 없음 (10번으로)				0			아니오		예	예	아니오	50	100000		예	3
2016-12-07 18:11:26	남	28	부산대학교	본과 4학년	피운 적 없음 (10번으로)									아니오	예	아니오				예	3
2016-12-07 18:11:40	여	28	부산대학교	본과 4학년	피운 적 없음 (10번으로)				0					예	예	예			폐암 심혈관질환 COPD	예	4		베라니클린 부프로피온 니코틴패치		아니오	2
2016-12-07 18:11:44	여	31	부산대학교	본과 4학년	피운 적 없음 (10번으로)									예	예	예	30	10만명	COPD 폐암 후두암	아니오	5	5R	부프로피온	7연	예	4
2016-12-07 18:12:23	남	31	부산대학교	본과 4학년	피운 적 없음 (10번으로)									예	예	아니오	40	100000	암 copd 고혈압	예	1	의지확인 해로움 금연방해요소 금연시좋은점 요약	니코틴 ssri	오년	예	1
2016-12-07 18:12:49	여	27	부산대학교	본과 4학년	피운 적 없음 (10번으로)									예	예	예	30	?	췌장암 방광암 폐암	예	3		부프로피온 클로니딘 바레니클린	10	예	3
2016-12-07 18:13:01	남	28	부산대학교	본과 4학년	피운 적 없음 (10번으로)									예	예	예	30	모름	폐암 심뇌혈관질환 copd	예	4		니코틴패치 부푸로피온 바레니크린	40	예	3
2016-12-07 18:13:29	남	25	부산대학교	본과 1학년	피운 적 없음 (10번으로)								현재로서는 전혀 금연할 생각이 없다.	예	예	아니오	70	5000명	폐암 구강암 후두암	예	1	모릅니다	껌같은것 니코틴패치 액체담배..?	10~15년	예	2
2016-12-07 18:14:40	여	27	부산대학교	본과 4학년	피운 적 없음 (10번으로)								1개월 안에 금연할 계획이 있다.	아니오	예	아니오	20	?		예	3		니코틴패치 아캄프로세이트 날트렉손	10	예	3
2016-12-07 18:15:22	여	28	부산대학교	본과 4학년	피운 적 없음 (10번으로)								현재로서는 전혀 금연할 생각이 없다.	예	아니오	예			폐암 식도암 후두암	예	4	계획전 계획 준비 실행 유지	부프로피온 바레니클린
2016-12-07 18:15:42	남	26	부산대학교	본과 4학년	피운 적 없음 (10번으로)									예	예	예	40	100000	암, COPD, 버거병	예	4	1. ask 2. assess 3. advice 4. assisit 5. arrange	니코틴패치, 껌, 부프로피온	10	예	3
2016-12-07 18:16:31	남	28	부산대학교	본과 4학년	100개비 미만	의대(혹은 의학전문대학원) 입학 이전	궐련	과거에는 피웠으나 현재 피우지 않음 (7-3번으로)						예	예	아니오	30		폐암 copd 기관지천식	예	4				예	3
2016-12-07 18:18:28	남	28	부산대학교	본과 3학년	100개비 이상	의대(혹은 의학전문대학원) 입학 이전	궐련	과거에는 피웠으나 현재 피우지 않음 (7-3번으로)			5개비3년			예	예	예	0.3		폐암 방광암 만성폐쇄성폐질환	예	4	고려전 고려 준비 실행 유지	챔픽스 껌 패치		예	4
2016-12-07 18:22:56	여	29	부산대학교	본과 4학년	피운 적 없음 (10번으로)									예	예	예	70	100000	폐암 방광암 Copd	예	5	.	바레니클린 부프로피온	10	예	3
2016-12-07 18:36:39	여	24	부산대학교	본과 3학년	피운 적 없음 (10번으로)									예	예	예	50	10000명	폐암 천식 췌장암	예	5					2
2016-12-07 18:37:03	남	29	부산대학교	본과 4학년	피운 적 없음 (10번으로)									아니오	예	아니오	30	3만명	copd, 폐암, 폐렴	예	5	클리닉, 금연동료만들기, 주변에알리기	니코틴 패치, 금연 껌, bupropion	5년	예	4
2016-12-07 18:41:56	남	31	부산대학교	본과 4학년	100개비 이상	의대(혹은 의학전문대학원) 입학 이전	궐련	과거에는 피웠으나 현재 피우지 않음 (7-3번으로)			3년 10개비 10년			예	예	예	0.3	10만명	폐암 방광암 식도암	예	4	모름	뷰스피론	10년	예	3
2016-12-07 18:53:06	남	30	부산대학교	본과 4학년	100개비 미만									예	예	예	?	?	?	예	4	?	?	?	예	3
2016-12-07 18:54:12	남	26	부산대학교	본과 4학년	100개비 미만	본과 1학년	궐련	과거에는 피웠으나 현재 피우지 않음 (7-3번으로)			3개월			예	예	예	60	500000	폐암,만성폐쇄성폐질환,후두암	예	4	.	부프로피온,니코틴패치,니코틴껌	10	아니오	3
2016-12-07 19:17:36	남	29	부산대학교	본과 4학년	피운 적 없음 (10번으로)
2016-12-07 19:38:47	여	33	부산대학교	본과 4학년	피운 적 없음 (10번으로)								1개월 안에 금연할 계획이 있다.	예	예	예				예	3	ㅑ		10	예	3
2016-12-07 19:49:13	남	36	부산대학교	본과 4학년	100개비 이상	의대(혹은 의학전문대학원) 입학 이전	궐련	매일 피움 (7-1번으로)	10개피			예	6개월 안에 금연할 계획이 있다.	아니오	예	예	0.2	5만명 이상	폐암 copd 방광암	예	3	의지확인 의존정도 확인 증상확인 금단증상 의학적 상태 말하기, 금연권고, 도움주기, 경고하기, 다음내원 정하기	부프로피온(챔픽스), 니코틴 패치, 니코틴껌	1년	예	5
2016-12-07 19:55:39	남	26	부산대학교	본과 3학년	피운 적 없음 (10번으로)									예	예	예	0.3	10만명	폐암 허혈성 심장 질환 뇌졸중	예	3	Ask Assess Advise Assist Arrange	bupropion varenicline nicotine patch	15년	예	2
2016-12-07 20:32:27	여	23	동아대학교	본과 2학년	피운 적 없음 (10번으로)									예	예	예	20	75000	폐암, 후두암, 뇌졸중	예	4	Background Affect Trouble Handling Empathy	Bupropion	10	예	3
2016-12-07 21:10:45	남	27	부산대학교	본과 4학년	피운 적 없음 (10번으로)									아니오	예	예	45	150000	폐암 COPD 방광암	예	2	격려 등	바레니클린 부프로피온 니코틴패치	5	예	2
2016-12-07 21:13:02	여	23	부산대학교	본과 1학년	피운 적 없음 (10번으로)							아니오		예	예	아니오			폐암 식도암	예	5				예	4
2016-12-07 21:43:10	여	28	부산대학교	본과 4학년	피운 적 없음 (10번으로)									아니오	예	예	30	5만	폐암 COPD 버거씨병	예	3		니코틴 패치 니코틴 껌 부프로피온	7	예	3
2016-12-07 22:52:37	남	27	부산대학교	본과 4학년	피운 적 없음 (10번으로)									예	예	아니오	30	50만	폐암 후두암 방광암	예	4	계획전 계획 실행 유지	바레니클린 니코틴패치 니코틴껌	3년	예	2
2016-12-08 03:34:24	남	28	부산대학교	본과 1학년	100개비 이상	의대(혹은 의학전문대학원) 입학 이전	궐련 무연담배(스누스, 스너프, 씹는 담배 등)	매일 피움 (7-1번으로)	10			예	6개월 안에 금연할 계획이 있다.	예	예	예	0.4	100	폐암 후두암 뇌졸중	예	3		니코틴껌 니코틴패치	5년	아니오	4
2016-12-08 08:44:23	여	27	부산대학교	본과 4학년	피운 적 없음 (10번으로)									아니오	예	예	20	100만	폐암 기관지 확장 위궤양	예	3		부푸로피온 니코틴 패치 바래니클린	10	예	3
2016-12-08 10:03:58	여	25	부산대학교	본과 3학년	피운 적 없음 (10번으로)									예	예	예	40	300	폐암, COPD, 후두암	예	2	5R (Relevance, Risk, Reward, Roadblock, Repetition)	니코틴 패치	40	예	2
2016-12-08 10:30:39	남	20	동아대학교	본과 1학년	피운 적 없음 (10번으로)									예	예	아니오	0.25	300	폐암, COPD	예	2				예	4
2016-12-08 11:32:53	남	32	고신대학교	본과 3학년	100개비 이상	의대(혹은 의학전문대학원) 입학 이전	궐련	과거에는 피웠으나 현재 피우지 않음 (7-3번으로)			10년 20개비 2년			예	예	아니오	50	10000	만성폐쇄성 폐질환 폐암 뇌경색	예	2		니코틴패치 전자담배	30년	아니오	2
2016-12-08 11:32:57	남	24	고신대학교	본과 3학년	100개비 이상	의대(혹은 의학전문대학원) 입학 이전	궐련 전자담배	매일 피움 (7-1번으로)	10			예	6개월 이내에는 아니지만 언젠가는 금연할 생각이 있다.	예	예	아니오	60	1000000	폐암 COPD 후두암	예	4		Varenicline Bupropion 니코틴 패치	10년	예	2
2016-12-08 11:36:20	남	27	고신대학교	본과 3학년	피운 적 없음 (10번으로)									예	예	아니오	0.4	10만명	폐암 식도암 copd	예	3		Varenicline Nicotin Naloxone	5년	예	2
2016-12-08 11:37:40	남	25	고신대학교	본과 3학년	피운 적 없음 (10번으로)	본과 1학년	궐련	매일 피움 (7-1번으로)	2-4개피			아니오	6개월 이내에는 아니지만 언젠가는 금연할 생각이 있다.	예	예	아니오	모른다	모른다	Lung ca. Obstructive lung ds.	예	3	모른다	정신과때배웠는데.. 기억이안납니다		예	1
2016-12-08 11:37:54	남	23	고신대학교	본과 3학년	피운 적 없음 (10번으로)									아니오	예	아니오	24	50000	폐암 COPD 뇌졸중	예	4	5R relevance risk rewards roadlock repetition	니코틴 껌	15년	예	3
2016-12-08 11:38:22	남	25	고신대학교	본과 3학년	피운 적 없음 (10번으로)								현재로서는 전혀 금연할 생각이 없다.	예	예	아니오				예	3					3
2016-12-08 11:43:24	여	23	고신대학교	본과 3학년	피운 적 없음 (10번으로)									예	아니오	아니오	잘 몰라요	잘 몰라요	폐암 구강암 COPD	예	5	잘 몰라요	부프로피온 Varenicline 니코틴 패치	10년	예	1
2016-12-08 11:45:14	여	23	고신대학교	본과 3학년	피운 적 없음 (10번으로)									예	예	아니오	30	10만명	폐암 copd 구강암	예	1		부스피론 바네리클린	10년	예	1
2016-12-08 11:58:40	여	24	고신대학교	본과 3학년	피운 적 없음 (10번으로)									예	예	아니오	20		폐암 후두암 구강암		2		부프로피온 날트렉손	5년	아니오	2
2016-12-08 11:59:03	남	24	고신대학교	본과 3학년	피운 적 없음 (10번으로)									예	예	아니오	40	6500000	폐암 후두암 COPD	예	3		Acamprosate Disulfiram Naltrexone	5	아니오	2
2016-12-08 11:59:35	여	24	고신대학교	본과 3학년	피운 적 없음 (10번으로)									예	예	예	0.15	10만명	폐암 후두암 구강암	예	2		부프로피온 날트록센 패치	10년	예	2
2016-12-08 12:03:34	남	25	고신대학교	본과 3학년	100개비 이상	의대(혹은 의학전문대학원) 입학 이전	궐련 전자담배	매일 피움 (7-1번으로)	10			예	6개월 이내에는 아니지만 언젠가는 금연할 생각이 있다.	예	예	예			폐암, copd, 뇌졸중	예	3		니코틴 패치, 니코틴껌,	10	예	1
2016-12-08 12:03:52	남	23	고신대학교	본과 2학년	피운 적 없음 (10번으로)									예	예	아니오	40	모름	폐암 후두암 인두암	예	2				예	2
2016-12-08 12:03:54	여	24	고신대학교	본과 2학년	피운 적 없음 (10번으로)									아니오	예	아니오			폐암scc 후두암 구강암 췌장암 인두암 골다공증 백내장	예	3		패치 전자담배..?	1년?	예	3
2016-12-08 12:08:19	남	24	고신대학교	본과 2학년	피운 적 없음 (10번으로)								현재로서는 전혀 금연할 생각이 없다.	예	예	아니오	50	0	기관지암 구강상피암 후두암	예	3		nicotine. bupropion. ssri	1년	아니오	2
2016-12-08 12:08:40	남	23	고신대학교	본과 2학년	피운 적 없음 (10번으로)									예	예	아니오	70	10000	COPD, pulmonary cancer, oral cancer	예	3	제시 부탁 권고 협박 강제	니코틴 패치	15	예	3
2016-12-08 12:08:59	남	21	고신대학교	본과 2학년	피운 적 없음 (10번으로)							예		예	예	아니오
2016-12-08 12:09:24	남	22	고신대학교	본과 2학년	피운 적 없음 (10번으로)				0					예	예	아니오	0.3	?	폐암 후두암 기관지암	예	5	경고 회유 위협	금연껌 니코틴패치 은단	5	예	1
2016-12-08 12:12:12	여	22	고신대학교	본과 2학년	피운 적 없음 (10번으로)									예	예	아니오	0.43	6만명	호흡기계질환, 악성종양, 심혈관계질환	예	5	계획전단계, 계획단계,준비단계,실행단계,유지단계	니코틴보충제, 정신작용제(bupropion), 니코틴부분효능제	15년	예	3
2016-12-08 12:12:26	남	25	고신대학교	본과 2학년	피운 적 없음 (10번으로)									아니오	예	아니오	85	흡연 관련사망자로 600만명	뇌경색 동맥경화 뇌출혈	예	3			5년	아니오	2
2016-12-08 12:28:57	남	23	고신대학교	본과 3학년	피운 적 없음 (10번으로)									아니오	예	예	20	500000	후두암 천식 폐암	예	2	-	니코틴 패치 금연초 등 대체제 날트렉손	10	예	2
2016-12-08 12:31:52	남	21	고신대학교	본과 2학년	피운 적 없음 (10번으로)									아니오	예	아니오	25	50000	폐암 뇌졸중 당뇨	예	3	모르겠습니다	varenicline nicotine patch bupropion	10년	예	1
2016-12-08 12:33:09	남	24	고신대학교	본과 3학년	피운 적 없음 (10번으로)									예	예	아니오	20	10000	폐암 뇌졸증 Polycytemia vera	예	2
2016-12-08 12:33:11	남	22	고신대학교	본과 2학년	100개비 이상	예과 1학년		과거에는 피웠으나 현재 피우지 않음 (7-3번으로)			1.5년, 1~2개비, 2년			예	예	아니오	30	?	관상동맥질환 폐암	아니오	3	?	니코틴 패치	5년	예	2
2016-12-08 12:40:45	남	22	고신대학교	본과 1학년	피운 적 없음 (10번으로)									예	예	아니오	잘 모르겠습니다	잘 모르겠습니다	폐암 구강암	예	2	잘 모르겠습니다	니코틴 패치?	잘 모르겠습니다	예	1
2016-12-08 12:41:24	여	21	고신대학교	본과 1학년	피운 적 없음 (10번으로)									예	아니오	아니오	30	1500	폐암 설암 식도암	예	2			6	예	1
2016-12-08 12:44:07	남	25	고신대학교	본과 1학년	피운 적 없음 (10번으로)									예	예	아니오	0.3	300명	폐암 후두암 인두암...	예	3		니코틴 패치	2년	아니오	1
2016-12-08 12:44:52	여	22	고신대학교	본과 1학년	피운 적 없음 (10번으로)									예	예	아니오					3
2016-12-08 12:47:06	여	22	고신대학교	본과 1학년	피운 적 없음 (10번으로)									예	아니오	아니오	30%?	10000명?	폐암 식도암 후두암	예	3	몰라요	니코틴 패치	10년이상?	아니오	3
2016-12-08 12:49:37	남	26	고신대학교	본과 3학년	100개비 이상	의대(혹은 의학전문대학원) 입학 이전	궐련	매일 피움 (7-1번으로)	13			예	현재로서는 전혀 금연할 생각이 없다.	아니오	예	예	0.2	잘모르겠다	폐암 역류성식도염 궤양	예	3		바레니클린 니코틴보조제	10년	예	4
2016-12-08 12:55:03	남	21	고신대학교	본과 1학년	피운 적 없음 (10번으로)									예	예	예
2016-12-08 13:02:11	여	22	고신대학교	본과 1학년	피운 적 없음 (10번으로)	본과 1학년			0			아니오		아니오	예	예	50	100	폐암 기관지암 구강암	예	3
2016-12-08 13:15:06	남	22	고신대학교	본과 1학년	피운 적 없음 (10번으로)				0					예	예	아니오	30	3000	암 폐쇄성 폐 질환 심질환	예	4		니코틴 패치 전자담배	30	예	2
2016-12-08 13:19:50	여	28	고신대학교	본과 3학년	피운 적 없음 (10번으로)									예	예	아니오	0.24	75910명	폐암, 뇌졸중, 허혈성 심장질환	예	3	5R 5S	니코틴 대체요법, 웰부트린, 챔픽스	5년	예	3
2016-12-08 13:55:31	남	23	고신대학교	본과 3학년	피운 적 없음 (10번으로)				0					예	예	아니오	15	20000	COPD 폐암 Cardiovascular disease	예	3	금연의 이점 교육 흡연의 해로움 교육 금연시 금단증상 교육 흡연욕구 충동시 대처법 교육 외래통원 기간 교육	니코틴 패치 Bupropion Vareniciline	15	아니오	3
2016-12-08 13:57:23	남	23	고신대학교	본과 3학년	피운 적 없음 (10번으로)				0					예	예	예	0.7	10000	식도암 폐암 copd	예	4	잘 모르겠습니다 죄송합니다 교수님 공부해보겠습니다	Varenicline Bupropion Venlafaxine	10년	예	2
2016-12-08 14:05:10	남	24	고신대학교	본과 3학년	피운 적 없음 (10번으로)							아니오		예	예	예	20	3만	COPD LUNGCANCER STROKE	예
2016-12-08 14:05:29	남	23	고신대학교	본과 3학년	100개비 미만	의대(혹은 의학전문대학원) 입학 이전		과거에는 피웠으나 현재 피우지 않음 (7-3번으로)			1개월 하루 3개비			예	예	아니오	20			예	4				예	2
2016-12-08 14:07:54	남	24	고신대학교	본과 3학년	100개비 이상	본과 3학년	궐련	매일 피움 (7-1번으로)	5			아니오	현재로서는 전혀 금연할 생각이 없다.	예	예	예	0.2	모르겠어요	Lung cancer Bladder cancer Laryngeal cancer	예	1	Precontemplation Contemplation Preparation Action Maintenance Relapse	Varenicline Bupropion	10years 이상	예	2
2016-12-08 14:39:49	남	22	고신대학교	본과 1학년	피운 적 없음 (10번으로)									예	예	아니오	60				3				예	3
2016-12-08 15:03:32	남	24	고신대학교	본과 3학년	피운 적 없음 (10번으로)									예	예	예	40	10만명	폐암 구강암 Copd	예	5		니코틴 패치	10년	예	2
2016-12-08 15:12:11	남	23	고신대학교	본과 3학년	피운 적 없음 (10번으로)									예	예	예	30	10000	폐암 copd 동맥경화	예	3		니코틴패치	20년	예	2
2016-12-08 15:13:00	남	23	고신대학교	본과 1학년	100개비 미만	의대(혹은 의학전문대학원) 입학 이전	궐련	가끔 피움 (7-2번으로)		7일 4개비		예	1개월 안에 금연할 계획이 있다.	예	예	아니오	0.3	?	폐암 구강암 고혈압	예	4		니코틴 패치 피우는 비타민	10년	예	3
2016-12-08 15:28:15	남	27	부산대학교	본과 3학년	피운 적 없음 (10번으로)							아니오	현재로서는 전혀 금연할 생각이 없다.	예	예	예	30	20000	폐암 후두암 뇌졸증	예	3	risk relavance repetiton reward	bupropion 니코틴패치 껌	15	아니오	3
2016-12-08 17:28:48	남	22	고신대학교	본과 3학년	피운 적 없음 (10번으로)									예	예	아니오	30	.	구강암 뇌졸중 폐암	예	2		Naltrexone Nicotine patch	15년	아니오	3
2016-12-09 01:03:00	남	22	고신대학교	본과 1학년	피운 적 없음 (10번으로)									예	예	아니오	50	10만명	폐암 식도암 전립선암	예	3	모르겠네요	니코틴 껌,패치 약물은 모르겠네요	모르겠습니다	예	2
2016-12-09 02:54:06	남	26	고신대학교	본과 2학년	100개비 이상	의대(혹은 의학전문대학원) 입학 이전	궐련 전자담배	매일 피움 (7-1번으로)	전자담배			예	6개월 이내에는 아니지만 언젠가는 금연할 생각이 있다.	아니오	예	아니오	30	모르겠습니다	심혈관계질환 호흡기계질환 인후두비강질환				챔픽스(varenicline) Bupropion	10	예	4
2016-12-09 13:54:27	남	28	부산대학교	본과 3학년	100개비 이상	의대(혹은 의학전문대학원) 입학 이전	궐련	매일 피움 (7-1번으로)	15			예	현재로서는 전혀 금연할 생각이 없다.	예	예	예	0.3	500	Copd Cancer	예	2				예	5
2016-12-10 15:39:34	여	23	부산대학교	본과 1학년	피운 적 없음 (10번으로)							아니오		예	예	예			폐암	예	3				예	2
2016-12-10 15:40:17	남	27	부산대학교	본과 1학년	피운 적 없음 (10번으로)									예	예	예	0.4	3만명	폐암 후두암 구강암	예	5		부프론피온	10	예	3
2016-12-10 15:41:07	남	24	부산대학교	본과 1학년	피운 적 없음 (10번으로)				0					예	예	예	30	300000	폐암 뇌졸증	예	3			30	예	3
2016-12-10 15:41:22	남	23	부산대학교	본과 2학년	100개비 이상	의대(혹은 의학전문대학원) 입학 이전	궐련	매일 피움 (7-1번으로)	17			아니오	1개월 안에 금연할 계획이 있다.	예	예	예	30	40000	폐암 구강암 설암	예	3	모르겟습니다	니코틴패치	10	예	1
2016-12-10 15:42:34	여	28	부산대학교	본과 1학년	피운 적 없음 (10번으로)									예	예	예	0.25	이만명	폐암, 위암, 식도암	아니오	3	Risk Relevance reward roadblock reception	니코틴패치 챔픽스 전자담배	계속	아니오	1
2016-12-10 15:43:15	남	25	부산대학교	본과 1학년	피운 적 없음 (10번으로)									예	예	예	40	7000	폐암 식도암 후두암	예	4				예	4
2016-12-10 15:44:40	남	24	부산대학교	본과 1학년	피운 적 없음 (10번으로)									예	예	예	0.3	5만명	소세포성폐암, 식도암, 구강암	예	4	-	nicotin patch nicotin gum	5년	아니오	3
2016-12-10 15:45:03	남	24	부산대학교	본과 1학년	피운 적 없음 (10번으로)	예과 1학년		과거에는 피웠으나 현재 피우지 않음 (7-3번으로)						예	예	예	40	10000	폐암 구강암 뇌졸중	예	3			10년	예	3
2016-12-10 15:46:21	여	30	부산대학교	본과 1학년	피운 적 없음 (10번으로)				0			아니오		예	예	예	모름	모름	폐암 후둥암 기형	예	2				예	2
2016-12-10 15:46:45	남	22	부산대학교	본과 1학년	100개비 이상	의대(혹은 의학전문대학원) 입학 이전	궐련	매일 피움 (7-1번으로)	10			예	6개월 이내에는 아니지만 언젠가는 금연할 생각이 있다.	예	예	예	40	50000	폐암 후두암 구강암	예	5		니코틴패치 금연껌 물	2	예	3
2016-12-10 15:48:09	여	26	부산대학교	본과 1학년	피운 적 없음 (10번으로)	의대(혹은 의학전문대학원) 입학 이전								예	예	예	20	5000	폐암 기관지염 면역저하	예	1	assessment advice ask	니코틴제제		아니오	1
2016-12-10 15:48:16	남	26	부산대학교	본과 1학년	피운 적 없음 (10번으로)									아니오	예	예	14	~	암, 폐렴, 심장질환	예	5
2016-12-10 15:48:22	남	24	부산대학교	본과 1학년	피운 적 없음 (10번으로)				0					예	예	예	43.1	75910	호흡계질환, 암, 심혈관계질환	예	5				아니오	5
2016-12-10 15:48:27	남	28	부산대학교	본과 1학년	100개비 이상	의대(혹은 의학전문대학원) 입학 이전	궐련	매일 피움 (7-1번으로)	10			예	현재로서는 전혀 금연할 생각이 없다.	예	예	예	30	100000	폐암 폐부종 폐협착	예	5	자극 상담 적극적도움 물리적도움 심리적도움	니코틴패치 니코틴껌 전자담배	2	예	5
2016-12-10 15:48:30	남	26	부산대학교	본과 1학년	100개비 이상	의대(혹은 의학전문대학원) 입학 이전	궐련	과거에는 피웠으나 현재 피우지 않음 (7-3번으로)			3년, 1개비			예	예	예	30	?	폐암 폐기종 식도암	예	5	?	?	10년	예	2
2016-12-10 15:49:12	여	23	부산대학교	본과 1학년	피운 적 없음 (10번으로)									예	예	예
2016-12-10 15:49:20	여	24	부산대학교	본과 1학년	피운 적 없음 (10번으로)									예	예	아니오	25	?	폐암 전립선암 대장암	예	1	?	?	?	예	2
2016-12-10 15:49:21	남	22	부산대학교	본과 1학년	피운 적 없음 (10번으로)									예	예	예					4
2016-12-10 15:49:25	여	26	부산대학교	본과 1학년	피운 적 없음 (10번으로)									예	예	예	30	모르겠다	폐암 Copd	예	3	모르겠다	모르겠다	3	예	3
2016-12-10 15:49:35	남	24	부산대학교	본과 1학년	피운 적 없음 (10번으로)									아니오	예	예	30	1000	폐암 COPD 폐렴	예	3			5	예	1
2016-12-10 15:50:11	남	23	부산대학교	본과 1학년	100개비 이상	의대(혹은 의학전문대학원) 입학 이전	궐련	매일 피움 (7-1번으로)	10			아니오	6개월 안에 금연할 계획이 있다.	아니오	예	예	30	만명	폐암 유방암 대장암	예	3	모릅니다	껌 패치 등등	1년	예	3
2016-12-10 15:50:51	남	26	부산대학교	본과 1학년	피운 적 없음 (10번으로)									예	예	예	15	20000	폐암 copd	예	4	5A	.	5	예	4
2016-12-10 15:52:34	남	26	부산대학교	본과 1학년	100개비 이상	의대(혹은 의학전문대학원) 입학 이전	궐련	매일 피움 (7-1번으로)	10			예	1개월 안에 금연할 계획이 있다.	예	예	예	0.3	3만5천명	인후두암. 폐암. 구강암	예	1	흡연여부. 금연요청. 금연의지묻기. 금연하는데 도움주고. Follow up. 다음 상담 날짜 잡기	니코틴껌. 니코틴패치. 챔픽스	15년정도?	예	2
2016-12-10 15:52:44	여	24	부산대학교	본과 1학년	피운 적 없음 (10번으로)				0					예	예	예	40	15만	폐암 copd 대장암	예	4	?	?	5년	예	2
2016-12-10 15:52:53	남	24	부산대학교	본과 1학년	100개비 미만	의대(혹은 의학전문대학원) 입학 이전	궐련	과거에는 피웠으나 현재 피우지 않음 (7-3번으로)			1개월, 0.1개비, 5년			예	예	아니오			폐암	예	3				예	2
2016-12-10 15:53:20	남	23	고신대학교	본과 1학년	피운 적 없음 (10번으로)									아니오	예	예	모름	모름	모름
2016-12-10 15:53:27	남	28	부산대학교	본과 1학년	100개비 이상	의대(혹은 의학전문대학원) 입학 이전	전자담배	매일 피움 (7-1번으로)	7			예	6개월 이내에는 아니지만 언젠가는 금연할 생각이 있다.	예	예	예	30	50만명	뇌졸중 암 폐기종	예	4	모름	금연검 금연패치	7	예	4
2016-12-10 15:53:27	남	27	부산대학교	본과 1학년	피운 적 없음 (10번으로)	의대(혹은 의학전문대학원) 입학 이전	궐련	과거에는 피웠으나 현재 피우지 않음 (7-3번으로)			안피움			예	예	예	30	만명	후두암 폐암 식도암	예	3	모름	니코틴 패치, 니코틴 껌	10	예	3
2016-12-10 15:53:50	여	24	부산대학교	본과 1학년	피운 적 없음 (10번으로)									예	예	아니오			폐암 구강암 후두암	예	4	ask advise allow assessment arrangement		5	예	2
2016-12-10 15:53:52	남	27	부산대학교	본과 1학년	100개비 이상	본과 1학년	물담배	매일 피움 (7-1번으로)	10			예	6개월 이내에는 아니지만 언젠가는 금연할 생각이 있다.	예	예	예	20	25만명	폐암 식도암 구강암	예	1	잘모르겟습니다	챔픽스 니코틴패치	10년	예	2
2016-12-10 15:55:22	남	24	부산대학교	본과 1학년	피운 적 없음 (10번으로)									예	예	예
2016-12-10 15:55:25	여	24	부산대학교	본과 1학년	피운 적 없음 (10번으로)									예	예	예	0.2	5만명	폐암 폐렴 대장암	예	4	ask assess advise assist arrange	니코틴패치 웰부트린 챔픽스	10년	아니오	3
2016-12-10 15:58:51	여	22	부산대학교	본과 1학년	피운 적 없음 (10번으로)									예	예	예	24	75919	폐암 췌장암 후두암	예	3	ask, assess, advise, assist, arrange	부푸로피온, 니코틴 패치, 니코틴 검	3	예	3
2016-12-10 16:01:30	여	25	부산대학교	본과 1학년	피운 적 없음 (10번으로)				0					예	예	예					2				예
2016-12-10 16:02:59	여	25	부산대학교	본과 2학년	피운 적 없음 (10번으로)				0			예		예	예	예	모름	모름	암 뇌졸중	예	4	모름	전자담배	모름	예	3
2016-12-10 16:03:46	여	24	부산대학교	본과 1학년	피운 적 없음 (10번으로)	본과 1학년						아니오	1개월 안에 금연할 계획이 있다.	아니오	예	예	30	100		예	5				예	5
2016-12-10 16:06:53	여	26	부산대학교	본과 1학년	피운 적 없음 (10번으로)									예	예	아니오	?	?	폐암 간암 후두암	예	1	?	?	?	예	1
2016-12-10 16:07:17	남	24	부산대학교	본과 1학년	피운 적 없음 (10번으로)									예	예	예	40	?	폐암 후두암 폐렴	예	3	.	.	10	예	2
2016-12-10 16:09:21	여	25	부산대학교	본과 1학년	피운 적 없음 (10번으로)							아니오		예		예				예	4	ask			예	2
2016-12-10 16:09:47	여	25	부산대학교	본과 1학년	피운 적 없음 (10번으로)									예	예	예				예	4				예	3
2016-12-10 16:12:36	남	33	부산대학교	본과 1학년	100개비 이상	의대(혹은 의학전문대학원) 입학 이전	궐련	과거에는 피웠으나 현재 피우지 않음 (7-3번으로)			1년, 10개비, 10년			예	예	예	30	십만명	COPD lung cancer	예	4	assign arrange assist				3
2016-12-10 16:12:39	여	24	부산대학교	본과 1학년	피운 적 없음 (10번으로)
2016-12-10 16:16:25	여	24	부산대학교	본과 1학년	피운 적 없음 (10번으로)							아니오	현재로서는 전혀 금연할 생각이 없다.	아니오	예	예					4				아니오	4
2016-12-10 16:20:26	남	25	부산대학교	본과 1학년	피운 적 없음 (10번으로)									예	예	예	0.393	58000	호흡기 질환	예	4	Advise assign ask arrange assessment	패치	10	예	3
2016-12-10 16:36:55	남	32	부산대학교	본과 1학년	100개비 이상	의대(혹은 의학전문대학원) 입학 이전	전자담배	매일 피움 (7-1번으로)	0			예	1개월 안에 금연할 계획이 있다.	아니오	아니오	아니오	90	10000	모릅니다	예	3	잘 모릅니다	전담	10	아니오	3
2016-12-10 16:40:00	여	27	부산대학교	본과 1학년	피운 적 없음 (10번으로)									예	예	예	30	천면	폐암	예	4			3년	예	1
2016-12-10 16:40:38	여	24	부산대학교	본과 1학년	피운 적 없음 (10번으로)				0					아니오	예	예	30	2만	폐암 설암 후두암	예	3	모르겠다	모르겠다	15	예	2
2016-12-10 16:46:48	남	25	부산대학교	본과 1학년	피운 적 없음 (10번으로)									아니오	예	예	40	10000	폐암 뇌졸중 후두암	예	4	모름	모름	모름	예	3
2016-12-10 17:16:22	남	29	부산대학교	본과 1학년	피운 적 없음 (10번으로)				0					예	예	예	?	?	COPD	예	4	?`	?	?	아니오	2
2016-12-10 17:19:25	여	24	부산대학교	본과 1학년	피운 적 없음 (10번으로)									예	예	예				예	4				아니오	3
2016-12-10 17:25:00	여	25	부산대학교	본과 1학년	피운 적 없음 (10번으로)									예	예	예	0.5				3				예	3
2016-12-10 17:26:11	남	26	부산대학교	본과 1학년	피운 적 없음 (10번으로)									예	예	예	모름	모름	폐암,구강암,	예	3	모름	금연패치,	모름	예	3
2016-12-11 20:42:57	남	27	부산대학교	본과 4학년	피운 적 없음 (10번으로)									아니오	예	아니오	50	100	폐암	예	4				예	3
2016-12-12 06:44:42	남	24	고신대학교	본과 2학년	피운 적 없음 (10번으로)									예	예	아니오	40	10만	폐암 폐기종 copd	예	3	모른다	니코틴패치 잘 모른다	20년	아니오	1
2016-12-12 09:16:38	남	25	동아대학교	본과 4학년	피운 적 없음 (10번으로)									예	예	예	0.42195	흡연으로 인해 발생하는 폐질환의 비교위험도는 모르겠습니다	구강암 기관지암 폐암	예	5	Ask assess assist arrange advice	니코틴패치 부프프로피온 챔픽스	10년	예	5
2016-12-12 09:17:02	남	24	동아대학교	본과 4학년	피운 적 없음 (10번으로)							아니오	현재로서는 전혀 금연할 생각이 없다.	예	예	예	40	10000	암 COPD 심뇌혈관질환	예	4	Ask assess assist advise arrange	바레니클린 부프로피온 니코틴패치		예	3
2016-12-12 09:20:24	남	24	동아대학교	본과 4학년	피운 적 없음 (10번으로)									예	예	예	0.35	3000명	만성폐쇄성폐질환 폐암 방광암	예	4	Ask Assessment Advice Assist Arrange	Varenicline Bupropion	15년	예	3
2016-12-12 09:21:08	남	30	동아대학교	본과 4학년	100개비 이상	의대(혹은 의학전문대학원) 입학 이전	궐련	과거에는 피웠으나 현재 피우지 않음 (7-3번으로)			10년 10개비			예	예	예	70	십만먙	폐암 COPD 기흉	예	5	RISK REWARD REPETITION RE R	Varenicline Bupropion Nicotine patch gum	10000000년	예	3
2016-12-12 09:22:16	남	33	동아대학교	본과 4학년	100개비 이상	의대(혹은 의학전문대학원) 입학 이전	궐련	과거에는 피웠으나 현재 피우지 않음 (7-3번으로)			3년,20개비,12년			예	예	예	0.3	30000	폐암, 후두암, 방광암	예	4	5a	바레니클린, 니코틴 껌, 니코틴 패치	5년	예	3
2016-12-12 09:24:41	남	26	동아대학교	본과 4학년	피운 적 없음 (10번으로)									아니오	예	예	30	50만	폐암	예	5	Ask assess advice assist arrange	항우울제	아니오	예	5
2016-12-12 09:26:14	남	27	동아대학교	본과 4학년	피운 적 없음 (10번으로)	의대(혹은 의학전문대학원) 입학 이전	궐련	과거에는 피웠으나 현재 피우지 않음 (7-3번으로)						예	예	예	0.3	5000명	폐암 만성폐쇄성폐질환 뇌졸중	예	4	ask assess advise assist arrange	varenicline bupropion clonidine	1년	예	4
2016-12-12 09:32:24	남	23	동아대학교	본과 4학년	100개비 미만	예과 2학년	궐련 전자담배	과거에는 피웠으나 현재 피우지 않음 (7-3번으로)			5년 7개비 100일			예	예	예	0.3	50000명	폐암 췌장암 CHD	예	3	Ask Assessment Advice Arrangement	Bupropion Varenicline 니코틴 패치	10년	예	4
2016-12-12 09:42:09	여	23	동아대학교	본과 3학년	피운 적 없음 (10번으로)									아니오	예	예	50	250000	만성폐쇄성폐질환. 심근경색. 폐암	예	3	동기부여. 목표설정.	부프로피온. 니코틴패치.	10	예	1
2016-12-12 09:44:49	남	27	동아대학교	본과 3학년										예	예	아니오	0.3	100000	폐암 폐렴 신장암	예	2		니코틴패치 니코틴검	5년	아니오	1
2016-12-12 09:47:16	여	25	동아대학교	본과 3학년	피운 적 없음 (10번으로)	본과 3학년	전자담배		0			아니오	현재로서는 전혀 금연할 생각이 없다.	예	예	예	30	100	폐암, COPD, MI	예	3	Ask Assess Assist Advise Arrangement	니코틴껌, 니코틴패치, 부프로피온	3년	예	1
2016-12-12 10:17:50	여	27	동아대학교	본과 4학년	피운 적 없음 (10번으로)							아니오		예	예	예	50	10000	뇌졸중 폐암 심근경색	예	2	조력자 방해자 금연의 이득 흡연의 위험성 격려	바레니클린 니코틴패치 니코틴껌	5	예	4
2016-12-12 11:20:13	남	25	동아대학교	본과 3학년	피운 적 없음 (10번으로)									예	예	예	0.3	10만명?	폐암 후두암 구강암	예	4		전자담배 니코틴껌	5년	예	2
2016-12-12 11:41:10	남	24	동아대학교	본과 4학년	피운 적 없음 (10번으로)									예	예	예	0.4	6만명	폐암,후두암,만성췌장염	예	3	고려전단계,고려단계,준비단계,실행단계,유지단계	varenicline,bupropione,니코틴패치	30년	아니오	4
2016-12-12 12:29:40	여	28	동아대학교	본과 4학년	피운 적 없음 (10번으로)							아니오		예	예	예	0.3	100000	copd cancer cva	예	3		바레니클린 니코틴패치 부프로피온	5	예	3
2016-12-12 12:31:24	남	31	동아대학교	본과 4학년	100개비 이상	의대(혹은 의학전문대학원) 입학 이전	궐련	매일 피움 (7-1번으로)	12			예	6개월 안에 금연할 계획이 있다.	예	예	예	50	15000	폐암 천식 만성호흡곤란	예	4	5p	패치 껌 바레니클린	10	예	5
2016-12-12 12:50:10	남	27	동아대학교	본과 3학년	100개비 미만	의대(혹은 의학전문대학원) 입학 이전	궐련	과거에는 피웠으나 현재 피우지 않음 (7-3번으로)			1갑/월			예	예	예	0.5	1만	폐암 폐기종 기관지염	예	3	모름	니코틴패치	1	예	5
2016-12-12 12:58:13	남	30	동아대학교	본과 4학년	피운 적 없음 (10번으로)									예	예	예	0.7		고혈압 당뇨 심뇌혈관질환	예	4		varenicline bupropion	5년	예	3
2016-12-12 13:40:42	여	23	동아대학교	본과 3학년	피운 적 없음 (10번으로)									예	예	예	10	5000	폐암 후두암 구강암	아니오	5				예	1
2016-12-12 13:42:06	남	28	동아대학교	본과 3학년	피운 적 없음 (10번으로)									예	예	아니오	60	20만	COPD 폐암 후두암	예	4	모름	니코틴패치 은단 금연초	3	예	2
2016-12-12 14:06:16	남	24	동아대학교	본과 4학년	피운 적 없음 (10번으로)								1개월 안에 금연할 계획이 있다.	예	예	예	모른다. 40%?	모른다.	고지혈증, 심뇌혈관질환, 거의 모든 종류의 신생물	예	4	흡연시 생기는 문제점 확인 도와줄수있는 주변 지원 확인 방해물 확인 금연시 얻는 이득 인지 치료 및 금단 증상 교육	니코틴 패치 챔픽스 부스피론	10년	예	4
2016-12-12 14:49:55	남	24	동아대학교	본과 4학년	피운 적 없음 (10번으로)									아니오	예	예			폐암 식도암 위암	예	4		Varenicline bupropion	10년	예	5
2016-12-12 14:50:44	남	32	동아대학교	본과 4학년	100개비 이상	의대(혹은 의학전문대학원) 입학 이전	궐련	가끔 피움 (7-2번으로)		10일 8개피		예	1개월 안에 금연할 계획이 있다.	예	예	예	0.4	십만명	폐암 후두암 copd	예	4	ask assess advice assist	varenicline bupropion nicotine patch	10년	예	4
2016-12-12 15:38:12	여	24	동아대학교	본과 4학년	피운 적 없음 (10번으로)									예	예	예	0.25	0.2	폐암,뇌졸중,허혈성심질환	예	4	5A(ask advise assess assist arrange)	Varenicline bupropion NRT(껌,패치 등)	15년	예	4
2016-12-12 16:26:51	남	27	동아대학교	본과 3학년	100개비 이상	의대(혹은 의학전문대학원) 입학 이전	궐련	매일 피움 (7-1번으로)	12			아니오	6개월 안에 금연할 계획이 있다.	예	예	예	40	100000	폐암 COPD 후두암 식도암 구강암 설암	예	3		패치	10년	예	3
2016-12-12 17:13:20	여	29	동아대학교	본과 3학년	피운 적 없음 (10번으로)									아니오	예	아니오	30	1000	만성폐쇄성폐질환 후두암 폐암	예	3	잘 모르겠습니다	니코틴 패치	5	아니오	2
2016-12-12 17:14:13	남	23	동아대학교	본과 3학년	피운 적 없음 (10번으로)									예	예	예	60	2000	Copd cancer	예	4				예	3
2016-12-12 17:42:00	남	24	동아대학교	본과 3학년	100개비 이상	의대(혹은 의학전문대학원) 입학 이전	말아 피우는 담배	과거에는 피웠으나 현재 피우지 않음 (7-3번으로)			중학교 3년, 재수 1년, 본과 1학년 1년 2일 반갑 정도 본과 2학년 때 금연 시작			예	예	아니오	70	100	폐암	예	4	모른다	니코틴패치 금연껌	5년	아니오	3
2016-12-12 17:59:11	남	24	동아대학교	본과 3학년	100개비 이상	본과 1학년	궐련	매일 피움 (7-1번으로)	6			아니오	6개월 이내에는 아니지만 언젠가는 금연할 생각이 있다.	예	예	예	25	10만명	폐암 copd 방광암	예	4		니코틴패치 전자담배	10년	예	1
2016-12-12 19:08:59	여	29	동아대학교	본과 3학년	피운 적 없음 (10번으로)									예	예	아니오	0.5								아니오	3
2016-12-12 19:24:17	남	28	동아대학교	본과 3학년	피운 적 없음 (10번으로)									예	예	예				예	3		니코틴 날록손 니코틴패치	20년	예	3
2016-12-13 02:42:11	남	27	동아대학교	본과 3학년	100개비 이상	의대(혹은 의학전문대학원) 입학 이전	궐련	과거에는 피웠으나 현재 피우지 않음 (7-3번으로)			10개피 2년			아니오	예	예	0.3	10만명	폐암 뇌졸중 위암	예	5	계획전단계 계획단계 준비단계 실행단계 유지단계	니코틴 보조제(껌, 흡입제, 패치) 정신작용제 니코틴부분효능제	10년	예	3
2016-12-14 15:28:59	남	26	부산대학교	본과 2학년	피운 적 없음 (10번으로)									예	예	예				예	3			불가능	예	3
2016-12-14 15:30:46	여	25	부산대학교	본과 2학년	100개비 이상	의대(혹은 의학전문대학원) 입학 이전	궐련	매일 피움 (7-1번으로)	10			예	현재로서는 전혀 금연할 생각이 없다.	예	예	예	30	10000	호흡기질환 순환기질환	예	2	까먹음	니코틴패치	10	예	2
2016-12-14 15:30:59	남	25	부산대학교	본과 2학년	100개비 이상	본과 2학년	궐련	과거에는 피웠으나 현재 피우지 않음 (7-3번으로)			1년, 200개비			예	예	아니오	50	50만명	폐암, COPD, 기관지염	예	4	5R	챔픽스, 바레니클린	2년	예	4
2016-12-14 15:31:31	남	25	부산대학교	본과 2학년	100개비 이상	예과 1학년	궐련	매일 피움 (7-1번으로)	6			예	6개월 이내에는 아니지만 언젠가는 금연할 생각이 있다.	예	예	예	0.3	50000	폐암, 설암, 후두암	예	3		naloxone	5	아니오	2
2016-12-14 15:34:21	남	27	부산대학교	본과 1학년	피운 적 없음 (10번으로)									예	예	아니오	21		심근경색 , 폐암, 구강암	예	3	ASK ASSESE ADVICE ASSSIGN ARRANGE	바레니클린 부프로피온 니코틴(껌, 사탕 패치)	5	예	3
2016-12-14 15:39:57	남	25	부산대학교	본과 2학년	피운 적 없음 (10번으로)									예	예	예									예	3
2016-12-14 15:49:01	남	23	부산대학교	본과 2학년	100개비 이상	의대(혹은 의학전문대학원) 입학 이전	궐련 전자담배	가끔 피움 (7-2번으로)		14일, 3개비		아니오	6개월 이내에는 아니지만 언젠가는 금연할 생각이 있다.	예	예	예	모름	모름	폐암 간암 후두암	예	3	모름	니코틴 패치	30년	예	2
2016-12-14 15:50:42	남	26	부산대학교	본과 2학년	피운 적 없음 (10번으로)									예	예	예	50	500000	폐암 후두암 구강암	예	4			5년	아니오	3
2016-12-14 16:07:27	남	28	부산대학교	본과 2학년	피운 적 없음 (10번으로)				0			아니오		예	예	예	0.3	100만	폐 자궁경부 식도암	예	1		니코틴 패치 금연초	20년	예	5
2016-12-14 17:01:16	남	23	부산대학교	본과 1학년	피운 적 없음 (10번으로)									예	예	예				예	3				예	3
2016-12-14 17:21:13	남	27	부산대학교	본과 3학년	피운 적 없음 (10번으로)									예	예	아니오	0.3	10만명	폐암 무기폐 혈관질환	예	4				아니오	3
2016-12-14 17:21:20	남	34	부산대학교	본과 3학년	100개비 미만	의대(혹은 의학전문대학원) 입학 이전	궐련	과거에는 피웠으나 현재 피우지 않음 (7-3번으로)			20개비			예	예	아니오	80	1000000	폐암 copd 폐결핵	예	1	모르겠습니다	항우울제	없다	아니오	1
2016-12-14 17:24:15	여	25	부산대학교	본과 3학년	피운 적 없음 (10번으로)									아니오	예	예			폐암 만성폐쇄성폐질환	예	3	Relevance,roadblock,reward,repetition,	챔픽스,		예	2
2016-12-14 17:26:09	남	26	부산대학교	본과 3학년	100개비 이상	의대(혹은 의학전문대학원) 입학 이전	궐련 전자담배	매일 피움 (7-1번으로)	10			아니오	6개월 이내에는 아니지만 언젠가는 금연할 생각이 있다.	아니오	예	예	50	50000	폐암 기관지암 식도암	예	2	충고 조언	전자담배 챔픽스 니코틴패치	10	아니오	4
2016-12-14 17:41:00	남	29	부산대학교	본과 3학년	100개비 이상	의대(혹은 의학전문대학원) 입학 이전	궐련	과거에는 피웠으나 현재 피우지 않음 (7-3번으로)			3년, 5개피, 1년			예	예	예	0.4	2만명	폐암 인두암 COPD	예	2	risk, relevance, rewards, roadblocks, receptition	니코틴 껌/패치 항우울제 Varrnicline	10년	예	3
2016-12-14 17:58:19	남	26	부산대학교	본과 3학년	피운 적 없음 (10번으로)				0			아니오		예	예	예	0.54	300000	폐암, 폐렴, COPD	예	2	Risk reward roadblock repetition	Bupripion	5	예	1
2016-12-14 18:19:15	남	26	부산대학교	본과 2학년	100개비 이상	의대(혹은 의학전문대학원) 입학 이전	궐련 전자담배 무연담배(스누스, 스너프, 씹는 담배 등) 물담배 말아 피우는 담배	매일 피움 (7-1번으로)	20			아니오	현재로서는 전혀 금연할 생각이 없다.	예	예	예	0.6
2016-12-14 18:47:04	여	24	부산대학교	본과 3학년	피운 적 없음 (10번으로)									아니오	예	아니오	0.3		폐암 구강암	예	3	Ask assess advise assist arrange	Varenicline	평생	예	2
2016-12-14 20:15:42	여	23	고신대학교	본과 1학년	피운 적 없음 (10번으로)									예	예	아니오	56	600	폐암 식도암	예	3			20	예	1
2016-12-14 20:35:47	남	31	부산대학교	본과 3학년	피운 적 없음 (10번으로)									예	예	예	0.4	100000	폐암, COPD, 뇌혈관질환	예	4	5R, Reward, Roadblock, Repeat, Risk	champix, naloxone, buspirone	20년		2
2016-12-15 10:19:01	여	27	동아대학교	본과 4학년	피운 적 없음 (10번으로)									아니오	아니오	예	30?	모름	폐암 세기관지염 만성폐쇄성폐질환	예	2		바레니클린 부프로피온		예	1
2016-12-15 13:52:31	남	22	고신대학교	본과 1학년	피운 적 없음 (10번으로)				0			아니오		예	예	아니오	?	?	기억이 안납니다 폐암	예	3	?	전자담배 니코틴 껌	?	예	1
2016-12-15 17:15:49	남	22	고신대학교	본과 1학년	피운 적 없음 (10번으로)									아니오	예	아니오			폐암 후두암 설암	예	3				아니오	2
2016-12-16 14:14:40	남	23	인제대학교	본과 4학년	피운 적 없음 (10번으로)									예	예	예	0.4	500000	1. 폐암 2. COPD 3. 방광암	예	4	1. Ask 2. Assess 3. Advise 4. Assist 5. Arrange	바레니클린 부프로피온 니코틴패치	20	예	4
2016-12-16 14:21:18	남	27	인제대학교	본과 4학년	100개비 이상	본과 1학년	궐련 말아 피우는 담배	매일 피움 (7-1번으로)	20			예	6개월 안에 금연할 계획이 있다.	아니오	예	예	40	20000	copd lung ca. burger's dz. stroke angina MI dyslipidemia	아니오	3			5	예	3
2016-12-16 14:22:34	여	24	인제대학교	본과 4학년	피운 적 없음 (10번으로)									예	예	예	25	40000명	폐암, 식도암, 방광암	예	4	ask, assess, advise, assist, arrange	바레니클린, 니코틴껌, 니코틴패치	5면	아니오	4
2016-12-16 14:22:40	여	24	인제대학교	본과 4학년	피운 적 없음 (10번으로)									아니오	예	예	0.4	1000	폐암 위암 식도암	예	4	ask assess advise assist arrange	니코틴패치 varenicline	15년	예	4
2016-12-16 14:23:33	남	25	인제대학교	본과 4학년	100개비 이상	의대(혹은 의학전문대학원) 입학 이전	궐련	가끔 피움 (7-2번으로)		10일, 3개비		아니오	6개월 이내에는 아니지만 언젠가는 금연할 생각이 있다.	예	예	예	40	10만명당 30명?	폐암 만성폐쇄성폐질환 후두암 방광암	예	5	Ask Assess Advice Assist Arrange	챔픽스, 웰부트린, 니코피온	10년	예	4
2016-12-16 14:23:45	남	24	인제대학교	본과 4학년	피운 적 없음 (10번으로)				0					예	예	예	25	10만	페암, 식도암, 방광암	예	4	Ask Assess Advise Assist Arrange	바레니클레인, 니코틴패치,	15년	아니오	3
2016-12-16 14:23:47	남	27	인제대학교	본과 4학년	피운 적 없음 (10번으로)									예	예	아니오	30	3000	폐암 만성폐쇄성기관지염 방광암	예	5		디설프람 날프록손	30	예	4
2016-12-16 14:23:49	여	24	인제대학교	본과 4학년	피운 적 없음 (10번으로)				0					예	예	예	0.4	1000	폐암 COPD 비인두암	예	5	고려전단계 고려단계 준비단계 시행단계 유지단계	부프로피온 바레니클린 니코틴패치	20년	예	3
2016-12-16 14:24:40	남	23	인제대학교	본과 4학년	피운 적 없음 (10번으로)									예	예	예	0.2	50000	폐암 방광암 후두암	예	3		바레니클린 니코틴 부프로피온	10년	예	4
2016-12-16 14:25:15	여	25	인제대학교	본과 4학년	피운 적 없음 (10번으로)									예	예	예	40?	10만명?	폐암 COPD 치아변색	예	4	5A ...assess, assist	바레니클린 부프로피온 니코틴패치/껌	20년	아니오	3
2016-12-16 14:37:36	여	25	인제대학교	본과 4학년	피운 적 없음 (10번으로)									아니오	예	예	???90?	40000000	폐암 copd 방광암 신장암 구강암 식도암	예	2	5R	바레니클린 부프로피온 니코틴대체제	10	아니오	3
2016-12-16 14:47:06	여	25	인제대학교	본과 4학년	피운 적 없음 (10번으로)									예	아니오	예	0.35	75000명	폐암 후두암 COPD	예	3	Ask Assess Advice Assist Arrangement	바레니클린 부프로피온 니코틴대치요법	5년	예	4
2016-12-16 14:50:28	여	22	인제대학교	본과 2학년	피운 적 없음 (10번으로)									아니오	예	예	0.3	2000000	폐암, 식도암, 치아질환	아니오	4	계획전, 계획, 준비, 실행, 유지	바레니클린, 부프로피온	1년	아니오	2
2016-12-16 14:52:08	남	25	인제대학교	본과 4학년	100개비 이상	의대(혹은 의학전문대학원) 입학 이전	궐련	과거에는 피웠으나 현재 피우지 않음 (7-3번으로)			5년, 10개비, 6개월			예	예	예	모름	모름	폐암 만성폐쇄성폐질환 심질환	아니오	5	현재건강상태알리기 위험 알리고 금연 전략 용기 북돋기 다음계획잡기	Varenicline Bupropione	10년 15년	예	5
2016-12-16 14:55:35	남	22	인제대학교	본과 2학년	100개비 미만	본과 1학년	궐련	과거에는 피웠으나 현재 피우지 않음 (7-3번으로)			평생 12개비			예	예	예	40	5만?	COPD asthma Lung cancer	예	4	Ask advise assess assist arrange-f/u	NRT 전자담배 금연초	10	예	2
2016-12-16 14:57:43	여	22	인제대학교	본과 1학년	피운 적 없음 (10번으로)							아니오		예	예	아니오	50	5000000	심혈관계 질환 각종 암 폐질환	예	2	Ask Advice Assess Assist Arrange	NPT 샴픽스 보투리온	10	예	3
2016-12-16 14:58:07	남	22	인제대학교	본과 1학년	100개비 이상	의대(혹은 의학전문대학원) 입학 이전	궐련	매일 피움 (7-1번으로)	20			아니오	6개월 이내에는 아니지만 언젠가는 금연할 생각이 있다.	예	예	예	0.4	잘 모르겠습니다	폐암, COPD, UIP	예	4	ask, advise, assess, assist, areangement	니코틴패치	5년	아니오	2
2016-12-16 14:58:35	여	21	인제대학교	본과 1학년	피운 적 없음 (10번으로)				0			아니오		예	예	예	20	50만명	폐암 dip rbild	예	5	ask assist assess ...	챔픽스 이부프로펜 니코틴패치	1년	예	4
2016-12-16 14:59:01	여	21	인제대학교	본과 1학년	피운 적 없음 (10번으로)									아니오	예	예	0.48	10000?	폐암 심장병 뇌졸중	예	4	assess assist..	니코틴껌 니코틴패치	25년	예	2
2016-12-16 15:03:20	여	21	인제대학교	본과 1학년	피운 적 없음 (10번으로)									예	예	예	0.45	6000000명	폐암 후두암 COPD	예	4	Ask Advise Assess Assist Arrange	NRT(니코틴 껌,,) 부프로피놀	20갑년	예	4
2016-12-16 15:03:27	남	21	인제대학교	본과 1학년	피운 적 없음 (10번으로)				0			아니오		예	예	예	약 30%	약 8만명	COPD, Lung Cancer, DIP 등	예	4	ask about tobacco use advise to quit assess willingness to make a quit attempt assit in quit attempt arrange follow-ups	니코틴 패치, 사탕 등; bupropion; vareniline	20	예	2
2016-12-16 15:03:31	여	26	인제대학교	본과 4학년	100개비 이상	예과 1학년	궐련	가끔 피움 (7-2번으로)		7일 5개비		예	1개월 안에 금연할 계획이 있다.	예	예	아니오	20	200	Copd lungcancer asthma	예	3	5 r relevance rewards risk roadblock repitition	바레니클린 부프로피옴 부스피론	20	예	4
2016-12-16 15:05:25	남	23	인제대학교	본과 2학년	피운 적 없음 (10번으로)									예	예	예	0.3	2만명	COPD Bronchitis Bladder cancer	예	3		니코틴 제제	2,3년	예	2
2016-12-16 15:07:15	남	26	인제대학교	본과 2학년	피운 적 없음 (10번으로)				0			아니오		예	예	예	30			예	3		부프로피온 날록손		예	2
2016-12-16 15:07:59	남	24	인제대학교	본과 4학년	피운 적 없음 (10번으로)									아니오	예	예	30	10000	폐암, 식도암, 방광암	예	4		니코틴 패치, 바레니클린, 부프로피온	시작한 직후	예	3
2016-12-16 15:10:07	남	23	인제대학교	본과 2학년	피운 적 없음 (10번으로)									예	예	예	0.4	아몰랑	Copd ILD Lung cancer	예	5			5	예	3
2016-12-16 15:18:34	남	24	인제대학교	본과 3학년	100개비 미만									예	예	예				예	3				아니오	4
2016-12-16 15:19:01	남	22	인제대학교	본과 3학년	피운 적 없음 (10번으로)									예	예	예	30	5만명	폐암 COPD 후두암	예	3	Ask A A A Arrange	부프로피온 니코틴패치	5년	예	2
2016-12-16 15:20:00	여	24	인제대학교	본과 3학년	피운 적 없음 (10번으로)									예	예	예	20	10000	폐암 COPD Colon cancer	예		비용 효과 방해요인 반복 계획	니코틴패치 부프로피온	10	예	3
2016-12-16 15:20:44	남	21	인제대학교	본과 2학년	피운 적 없음 (10번으로)				0					예	예	예	30		COPD MI 폐암	예	4		니코틴 패치 니코틴껌 부프로피온?	10	예	3
2016-12-16 15:20:46	남	23	인제대학교	본과 2학년	100개비 미만	의대(혹은 의학전문대학원) 입학 이전	궐련	과거에는 피웠으나 현재 피우지 않음 (7-3번으로)			1년 5개비 8년			예	예	예	20	3만	artherosclerosis 폐암 후두암	예	5		니코틴패치	5년	예	2
2016-12-16 15:22:24	남	22	동아대학교	본과 3학년	피운 적 없음 (10번으로)	예과 2학년	궐련	매일 피움 (7-1번으로)	18			아니오	6개월 이내에는 아니지만 언젠가는 금연할 생각이 있다.	예	예	예	0.24	6만명	만성폐쇄성폐질환 소세포폐암 관상동맥질환	예	4	Ask assess advise assist arrange	바레니클린 부프로피온 니코틴 패치	15년	예	1
2016-12-16 15:23:07	남	24	인제대학교	본과 3학년	피운 적 없음 (10번으로)									예	예	예	0.4	50,000명	Small cell lung cancer COPD Stroke	예	2	Ask Assess Advice Assist Arrange	니코틴 껌 니코틴 패치 바레니클린	2	예	2
2016-12-16 15:23:55	남	21	인제대학교	본과 1학년	피운 적 없음 (10번으로)									예	예	예	43	500000	Copd 폐암	아니오	4	Ask Advise Assess A Appointment	니코틴 대체 요법,		예	2
2016-12-16 15:23:55	여	25	인제대학교	본과 3학년	피운 적 없음 (10번으로)									예	예	예	10	10만명	폐암 심혈관계질환 COPD	예	2	준비	부프로피온 BDZ	10	예	2
2016-12-16 15:23:59	여	23	인제대학교	본과 3학년										예	예	예	15	200	폐암 구강암 만성폐쇄성폐질환	예	5	준비전단계 준비단계 계획단계 실천단계 유지단계	1. 니코틴패치 2. 부프로피온 3. 벤조디아제핀	10	아니오	4
2016-12-16 15:25:05	남	25	인제대학교	본과 3학년	피운 적 없음 (10번으로)									예	예	예	30	300	COPD	예	3		부프로피온 니코틴패치	10	아니오	2
2016-12-16 15:25:37	여	25	인제대학교	본과 3학년	피운 적 없음 (10번으로)									예	예	예			폐암 식도암	예	4			10	예	3
2016-12-16 15:26:40	남	21	인제대학교	본과 1학년	100개비 미만	예과 1학년	말아 피우는 담배	과거에는 피웠으나 현재 피우지 않음 (7-3번으로)			살면서 10개비정도 펴봤음			예	예	예	20	100만명	암, 고혈압, COPD	예	5		니코틴 보조제	10	아니오	4
2016-12-16 15:27:56	여	21	인제대학교	본과 1학년	피운 적 없음 (10번으로)									예	예	예	20	25만명	폐암, emphysema, chronic bronchitis	아니오	4	Ask assess assist approach	니코틴	10년이상	예	3
2016-12-16 15:28:17	여	23	인제대학교	본과 3학년	피운 적 없음 (10번으로)									예	예	예	0.2	1천명	폐암 copd	예	2				예	1
2016-12-16 15:28:21	여	21	인제대학교	본과 1학년	피운 적 없음 (10번으로)									예	예	예	43	300만명	UIP DIP COPD	예	5	5A Ask advise assess assist arrange	니코틴패치 부프로피온 바레니클린	30년	예	3
2016-12-16 15:28:33	여	24	인제대학교	본과 2학년	피운 적 없음 (10번으로)									예	예	예	30	만명...?	폐암 관상동맥질환 버거씨병	예	4				아니오	1
2016-12-16 15:30:22	남	24	인제대학교	본과 1학년	피운 적 없음 (10번으로)									예	예	예	43	50만	폐암. copd. 후두암	예	4			10년	예	3
2016-12-16 15:31:58	여	21	인제대학교	본과 1학년	피운 적 없음 (10번으로)									예	예	예	30	30000	lung cancer COPD DIP	예	5	ask advise assess assist arrange	니코틴대체요법 바레니클린	30년	예	3
2016-12-16 15:34:04	여	20	인제대학교	본과 1학년	피운 적 없음 (10번으로)									예	예	예	0.3	10만명	COPD DIP RBILD	예	5	Ask Advise Assess Assist Arrange	니코틴패치 Bupropion Varenicline	30년	예	3
2016-12-16 15:36:05	남	22	인제대학교	본과 1학년	피운 적 없음 (10번으로)								현재로서는 전혀 금연할 생각이 없다.	예	예	예	30	1000000	폐암, MI, 뇌졸중	예	4	Ask advice assess a	니코틴 패치, 항우울제	5년	예	2
2016-12-16 15:38:55	남	22	인제대학교	본과 2학년	100개비 이상	의대(혹은 의학전문대학원) 입학 이전	궐련 전자담배	매일 피움 (7-1번으로)	10			예	1개월 안에 금연할 계획이 있다.	예	예	예	40	50000	폐암 후두암 폐기종	예	4	Ask Advise Assess Assist Arrange	부프로피온 바레니클린 니코틴패치	15	예	4
2016-12-16 15:45:23	여	20	인제대학교	본과 1학년	피운 적 없음 (10번으로)									예	예	예	23퍼센트 정도	300	폐암 급성관상동맥증후군 폐색전증	예	4	Ask Advise Assess Assist Arrange	니코틴패치 등 니코틴대체제 바레니클린 부프로피온	10	예	2
2016-12-16 15:52:22	남	21	인제대학교	본과 1학년	100개비 미만	예과 2학년		과거에는 피웠으나 현재 피우지 않음 (7-3번으로)						예	예	예				예	4				예	3
2016-12-16 15:56:32	여	21	인제대학교	본과 1학년	피운 적 없음 (10번으로)									아니오	예	예	43	30만명	폐암 COPD IIP, DIP, RB-ILD LCH, AEP	예	3	Ask Assess Advise Assist Arrange A	NRT Bupuripion Valenicline	30년	예	2
2016-12-16 15:56:56	남	22	인제대학교	본과 1학년	피운 적 없음 (10번으로)				0					예	예	예	30		폐암,뇌혈관질환,심장질환	예	3	Ask advice assess assist arrange	니코틴 부프로피온 바레니클린	10	예	4
2016-12-16 16:04:22	남	22	인제대학교	본과 1학년	피운 적 없음 (10번으로)	예과 1학년			0			아니오		예	예	예	30	10000	COPD lung cancer 심혈관계질환	예	3			안됨	예	3
2016-12-16 16:09:51	남	23	인제대학교	본과 3학년	피운 적 없음 (10번으로)									아니오	예	예	0.3	5만명	폐암 COPD ILD	예	3	Ask - 금연의지가있는지물어본다 Assess - 금연할생각이있는지평가 Advice - 맞춤전략제시 Assist - 도와준다 Arrange - 추적관찰	바레니클린 부프라피온 니코틴패치	10년	예	3
2016-12-16 16:16:06	여	28	인제대학교	본과 3학년	피운 적 없음 (10번으로)							아니오		예	예	예	0.3	10000	폐암 후두암 COPD	아니오	4	고려전단계 고려단계 계획수립 금연시도	부프로피온, 니코틴패치	10년	예	3
2016-12-16 16:24:14	여	21	인제대학교	본과 1학년	피운 적 없음 (10번으로)				0			아니오		예	예	예				예	5				예	1
2016-12-16 16:33:49	여	22	인제대학교	본과 1학년	피운 적 없음 (10번으로)									예	예	예	0.2	10000	폐암, copd, DIP	예	4		니코틴패치	30	예	3
2016-12-16 17:25:24	남	27	인제대학교	본과 4학년	100개비 미만	본과 3학년	궐련	과거에는 피웠으나 현재 피우지 않음 (7-3번으로)			2년, 10개비, 1년			예	아니오	예	50	6000000	폐암 식도암 협심증/심근경색	예	4	Ask Advise Assess Assist Arrange	니코틴 대체 요법 부프로피온 바레니클린	15	예	2
2016-12-16 17:47:45	남	23	인제대학교	본과 2학년	100개비 이상	의대(혹은 의학전문대학원) 입학 이전	궐련	과거에는 피웠으나 현재 피우지 않음 (7-3번으로)			5년 25개비, 1년			예	예	예	50	300000	COPD, 폐암, GERD	예	5	의지? 금연 금연 유지 금연 성공	바레니클린 챔픽스	15	예	3
2016-12-16 19:52:55	남	24	인제대학교	본과 2학년	피운 적 없음 (10번으로)									아니오	예	예	0.3	10만명	그냥 모든질병이 다 생김	예	1	아 배웠는데 기억이..	이것도 배웠는데.. 니코틴패치, 검, 또 뭐였더라	3년	예	1
2016-12-16 20:08:59	여	23	인제대학교	본과 4학년	피운 적 없음 (10번으로)									예	예	예			폐암 후두암 식도암	예	5	ask advise assess assist arrange	니코틴보충제 바레니클린 부프로피온	5년	예	3
2016-12-16 23:20:14	여	22	인제대학교	본과 1학년	피운 적 없음 (10번으로)									예	예	예	0.3	5000	폐암, 간질성폐질환, 기관지확장증	예	3	Ask, Advise, Assess, Assist, Arrange	니코틴 패치, 니코틴 껌, 사탕	20	예	2
2016-12-17 10:25:03	남	24	인제대학교	본과 4학년	100개비 이상	의대(혹은 의학전문대학원) 입학 이전	궐련	매일 피움 (7-1번으로)	13			예	현재로서는 전혀 금연할 생각이 없다.	예	예	예	0.226	60000	폐암 후두암 뇌졸중	예	3	5r risk relavance rewards roadblocks repetition	챔픽스 니코틴 패치 니코틴 사탕	2	예	5
2016-12-17 17:22:59	여	22	인제대학교	본과 1학년	피운 적 없음 (10번으로)				0					예	예	예	0.4	600만명	폐암, 고혈압, COPD	예	4	ask Advice Assess Assist Arrange	니코틴 패치, 바레니클린	20년	예	2
2016-12-17 19:11:44	남	23	인제대학교	본과 2학년	100개비 이상	의대(혹은 의학전문대학원) 입학 이전	궐련	과거에는 피웠으나 현재 피우지 않음 (7-3번으로)			하루한갑 2년반			예	예	예	30	모름	COPD Lung cancer Oral cancer	예	4	Ask advise assess assist arrange	Nicotine replacement therapy Bupropion Varenicline	1년	예	2
2016-12-17 20:14:13	남	29	동아대학교	본과 2학년	피운 적 없음 (10번으로)									예	아니오	아니오	36.2	약6만명	뇌졸중,copd,후두암	예	4	???	부프로피온	3	예	2
2016-12-17 20:22:09	남	24	동아대학교	본과 2학년	피운 적 없음 (10번으로)									예	예	아니오	30	3000	copd 폐암 대장암	예	4			15	예	2
2016-12-17 20:45:36	남	23	동아대학교	본과 2학년	100개비 미만	본과 2학년	궐련	과거에는 피웠으나 현재 피우지 않음 (7-3번으로)						예	예	아니오	0.25	모르겠습니다	혈압상승 폐암 후두암	예	4	모르겠습니다	금연패치나 껌	모르겠습니다	예	3
2016-12-17 21:10:33	남	24	동아대학교	본과 2학년	100개비 이상	본과 1학년	궐련	매일 피움 (7-1번으로)	8			예	6개월 안에 금연할 계획이 있다.	예	예	아니오	20	100000	폐암 구강암 기관지염	예	3	모름	금연껌 금연패치	10년	예	1
2016-12-18 02:40:53	남	22	동아대학교	본과 2학년	피운 적 없음 (10번으로)									예	예	아니오	30	10000	암, 천식, 뇌출혈	예	4		니코틴제, 항우울제	1년	예	2
2016-12-18 12:39:13	여	22	인제대학교	본과 1학년	피운 적 없음 (10번으로)									예	예	예	40		폐암 copd 동맥경화	예	4	Ask advice assess assist arrange	NRT Bupropion Varenicline	10	아니오	4
2016-12-18 13:21:37	남	24	동아대학교	본과 2학년	100개비 이상	의대(혹은 의학전문대학원) 입학 이전	궐련	매일 피움 (7-1번으로)	5			예	6개월 이내에는 아니지만 언젠가는 금연할 생각이 있다.	예	예	아니오	30	300000	동맥경화 구강암 폐암	예	4		금연초 니코틴패치 니코틴껌	10	예	4
2016-12-18 20:05:33	여	22	인제대학교	본과 1학년	피운 적 없음 (10번으로)									예	예	예	43.7	30000	lung cancer, DIP, RB-ILD, LCH, COPD, AEP	예	4	Ask Advise Assess Assist Arrange	니코틴 부프로피온 바레니클린	20	예	3
