# Supplementary material for: Effects of education methods on self-efficacy of smoking cessation counseling among medical students
Source: PeerJ. 2021 May 7;9:e11408. doi: 10.7717/peerj.11408 (PMC8109004; doi:10.7717/peerj.11408)
Supplement: Supplemental Information 2 [file peerj-09-11408-s002.xlsx]

## Sheet: Sheet1
TIME	sex	age	group	year	Lifetime smoking amount	When you started smoking	type of ciga	Current smoking amount	Average daily smoking amount	Number of smoking days in the last 1 month, (smoking days) Average amount of smoking per day	What is the past smoking period, average daily smoking amount and smoking cessation period in the past?	Experience in trying to quit smoking	Smoking cessation plan	Secondhand smoke experience in the last 7 days	I've learned the harm of smoking	Have been trained in smoking cessation counseling techniques	Korean Adult Smoking Rate	15. Number of people who die from smoking in one year in Korea	16. Illnesses that can be caused by smoking	17. Can secondhand smoke cause a stroke?	18. Can a simple smoking cessation counseling provided by a healthcare provider affect my success in smoking cessation?	Step 5 of counseling technique	20. Smoking cessation aids or drugs	Smoking cessation period when the risk of cardiovascular disease is reduced to a level similar to that of non-smokers	22. Does quitting smoking reduce premature death regardless of age?	23. Do you think you can skillfully consult a smoker who needs help to quit smoking?
2016-12-05 00:25:23	F	26	P	2	Never smoked (go to number 10)									Yes	Yes	Yes	30		Lung cancer, Cataract, Periodontal disease	Yes	3
2016-12-05 10:15:37	M	23	P	1	More than 100	Before entering medical school	cigarette Electronic cigarette무연담배(스누스, 스너프, 씹는 담배 등) Hookah	Smoke every day (go to Number 7-1)	20			Yes	Currently, I have no intention of quitting smoking at all.	Yes	Yes	Yes	30	1000000	Lung cancer, Oropharyngeal cancer, Esophageal cancer	Yes	4	5R, 5A	니코틴패치		No	2
2016-12-05 17:58:07	M	26	P	1	Never smoked (go to number 10)									Yes	Yes	Yes	0.5	1만명	Lung cancer, Oropharyngeal cancer, Esophageal cancer	Yes	3			10년	Yes	2
2016-12-05 17:58:20	M	26	P	1	Never smoked (go to number 10)									Yes	Yes	Yes	0.5	1만명	Lung cancer, Oropharyngeal cancer, Esophageal cancer	Yes	3			10년	Yes	2
2016-12-06 16:33:09	M	27	P	1	More than 100	Before entering medical school	cigarette	Smoke every day (go to Number 7-1)	6			Yes	I plan to quit smoking within 6 months.	Yes	Yes	Yes	30	100만	펴암 Colon cancer Stroke	Yes	3		금연검 패치 심리치료	7	Yes	3
2016-12-06 16:33:24	M	25	P	1	Never smoked (go to number 10)									Yes	Yes	Yes	30	10000	Lung cancer, Laryngeal cancer, Oropharyngeal cancer	Yes	3		패치, 껌	20	Yes	3
2016-12-06 16:33:31	F	25	P	1	Never smoked (go to number 10)				0			No	Currently, I have no intention of quitting smoking at all.
2016-12-06 16:34:49	M	23	P	1	More than 100	Before entering medical school	cigarette Electronic cigarette	Smoke every day (go to Number 7-1)	10			Yes	I plan to quit smoking within 6 months.	Yes	Yes	Yes	25	1만	Cancer, Hypertensiton, COPD	Yes	5		니코틴껌	5년	Yes	5
2016-12-06 16:35:34	M	25	P	1	Never smoked (go to number 10)							No	Currently, I have no intention of quitting smoking at all.	No	Yes	Yes	30
2016-12-06 16:36:24	F	25	P	1	Never smoked (go to number 10)									Yes	Yes	Yes	30%?	10만명?	Lung cancer, COPD, Dependance	Yes	3		은단 패치	10년	No	3
2016-12-06 16:37:30	F	25	P	1	Never smoked (go to number 10)									Yes	Yes	No	30	만명	Lung cancer Esophageal cancer	Yes	4			5년	No	1
2016-12-06 16:38:50	F	23	P	1	Never smoked (go to number 10)							No		Yes	Yes	No			Lung cancer, Bronchitis, Laryngeal cancer	Yes	1				Yes	3
2016-12-06 16:42:34	M	27	P	4	Never smoked (go to number 10)									Yes	Yes	Yes	35	100000	Lung cancer, COPD, Stomack cancder	Yes	3	모르겟습니다	바레니클린 부프로피온	10y	Yes	3
2016-12-06 16:43:18	M	29	P	4	More than 100	1	cigarette	Smoked in the past, but not now (go to Number 7-3)			3년, 하루 1/3갑, 6개월			Yes	Yes	No	0.15	5만명	COPD, MI, Pancareas cancer	Yes	2	.	varenicline bupropione	2	Yes	3
2016-12-06 16:44:35	M	32	P	4	Never smoked (go to number 10)									Yes	Yes	Yes	30	10000	Lung cancer, COPD, Bladder cancer	Yes	4	5R 5A	챔픽스 니코틴패치	10	Yes	3
2016-12-06 16:45:34	F	27	P	2	Never smoked (go to number 10)									Yes	Yes	Yes	0.3	500만명	Lung cancer, Oropharyngeal cancer, Laryngeal cancer	Yes	4	잘 기억이 안납니다ㅠㅠ	니코틴패치, Electronic cigarette, 니코틴껌	15년	Yes	4
2016-12-06 16:45:41	M	29	P	4	Never smoked (go to number 10)									Yes	Yes	Yes	40	??	copd. lung cancer. pancreas cancer	Yes	3		bupropion. 니코틴패치.	5	Yes	1
2016-12-06 16:46:02	F	27	P	4	Never smoked (go to number 10)									Yes	No	Yes	20	100000	Cancer, CVD, CbVD	Yes	3		부프로피온 니코틴패치	10년	Yes	2
2016-12-06 16:59:50	M	27	P	2	Never smoked (go to number 10)									Yes	Yes	Yes
2016-12-06 17:00:11	M	30	P	2	More than 100	Before entering medical school	cigarette	Smoke every day (go to Number 7-1)	18			No	Currently, I have no intention of quitting smoking at all.	Yes	Yes	Yes	20	10000	COPD, Stroke, Lung cancer	Yes	1
2016-12-06 17:07:02	M	27	P	2	More than 100	Before entering medical school	cigarette	Smoke every day (go to Number 7-1)	15			Yes	Currently, I have no intention of quitting smoking at all.	Yes	Yes	Yes	40	100000	Cancer, CVD, COPD	Yes	3	5A,5R	참픽스, 니코틴패치, 니코틴 껌	20년	Yes	2
2016-12-06 17:07:21	M	30	P	2	Never smoked (go to number 10)									No	Yes	Yes	40	1만명	Lung cancer , CVD, COPD	Yes	2		바레니클라인 , 부프로피온	20년	Yes	1
2016-12-06 17:08:34	F	24	P	2	Never smoked (go to number 10)									Yes	Yes	Yes	40	100000	Lung cancer. Oropharyngeal cancer. COPD	Yes	4	5R	부프로피온, 참픽스	20년	Yes	3
2016-12-06 17:10:01	F	24	P	2	Never smoked (go to number 10)									Yes	Yes	Yes	0.4	ㅠㅠ모르겠어요	Lung cancer, chronic bronchitis, COPD	Yes	3	고려전단계 고려단계 준비단계 실행단계 유지단계	Benzodiazepine	10년 이상	Yes	4
2016-12-06 17:28:54	M	31	P	2	More than 100	Before entering medical school	cigarette	Smoke every day (go to Number 7-1)	17			Yes	I plan to quit smoking within 6 months.	Yes	Yes	Yes	40	모름	Cancer, Stroke, MI	Yes	4	.	챔픽스 패치	10	Yes	4
2016-12-06 17:29:03	F	27	P	2	Never smoked (go to number 10)									Yes	Yes	Yes	50	5000	Lung cancer,Laryngeal cancer, CbVD	Yes	3	Ask-assess-advise-assist-arrange	니코틴패치,champix(varenicline), bupropion	1	Yes	3
2016-12-06 17:53:17	M	23	D	1	Never smoked (go to number 10)									Yes	Yes	Yes	0.3		Lung cancer, Oropharyngeal cancer, Esophageal cancer	Yes	2		니코틴 패치	10년	Yes	2
2016-12-06 17:57:24	M	21	D	1	Never smoked (go to number 10)									Yes	Yes	No	0.25	500명	Lung cancer, DM, Hypertension	Yes	5		니코틴 패치 니코틴 껌 사탕	10년	No	3
2016-12-06 18:41:33	M	25	D	2	Never smoked (go to number 10)									Yes	Yes	Yes	0.393		Lung cancer, Osteoporosis, Cataract	Yes	4	5R's Risk, Relevance, Rewards, Roadblocks, Receptition	니코틴 패치, 니코틴 껌, 부프로피온,		Yes	3
2016-12-06 19:16:39	M	27	D	1	Never smoked (go to number 10)									Yes	Yes	No	0.4	50만명	Lung cancer	Yes	5	모르겠어요	금연 패치, 금연 껌	5년이상	Yes	1
2016-12-06 20:10:31	M	26	P	2	Less than 100	Before entering medical school	cigarette	Smoked in the past, but not now (go to Number 7-3)			2주, 2개피, 4년			Yes	Yes	Yes	0.3	1만명	Lung cancer, COPD, Laryngeal cancer	Yes	5	1) 고려전단계 2) 고려 단계 3) 준비 단계 4) 실행 단계 5) 유지 단계	니코틴 패치, 부프로피온, 바레니클린	5년	Yes	4
2016-12-06 21:42:25	F	26	P	1	Never smoked (go to number 10)									Yes	Yes	Yes	15	500	Lung cancer, 버거씨병, 기관지 Laryngeal cancer	No	4	Assist ask advise arrange	니코틴패치	25	Yes	3
2016-12-06 23:00:47	M	27	P	1	More than 100	Before entering medical school	cigarette	Smoke every day (go to Number 7-1)	15			No	Not within six months, but I plan to quit smoking someday.	Yes	Yes	Yes	30	500	Lung cancer Esophageal cancer Oropharyngeal cancer	Yes	2	5A	니코틴 껌 니코틴 패치 무연담배	5년	No	3
2016-12-07 14:06:59	M	20	D	1	Never smoked (go to number 10)									Yes	Yes	No	30	5000	Lung cancer. 폐렴,	Yes	4			3년	No	2
2016-12-07 17:45:24	M	26	P	3	More than 100	Before entering medical school		Smoked in the past, but not now (go to Number 7-3)			5년 10개비 3년			No	No	Yes	30	1000		Yes	3				Yes	3
2016-12-07 17:45:32	M	26	P	3	Never smoked (go to number 10)									No	Yes	No	40	100만	Lung cancer 폐기종 Esophageal cancer	Yes	4	5a	부프로피온 챔픽스	30년	Yes	5
2016-12-07 17:46:01	M	24	P	1	More than 100	Before entering medical school	cigarette Electronic cigarette무연담배(스누스, 스너프, 씹는 담배 등) Hookah	Smoke every day (go to Number 7-1)	20			Yes	Currently, I have no intention of quitting smoking at all.	Yes	Yes	Yes			Lung cancer, Oropharyngeal cancer, Esophageal cancer	Yes	4		니코틴		No	2
2016-12-07 17:48:01	F	25	P	3	Never smoked (go to number 10)				0			No		Yes	Yes	Yes	0.6	10만명	심혈관질환 Lung cancer, COPD	Yes	4	동기부F	부프로피온 껌 은단	10년	Yes	3
2016-12-07 17:49:48	M	27	P	1	Never smoked (go to number 10)				안 핌					Yes	Yes	No				Yes	3				Yes	3
2016-12-07 17:51:48	M	30	P	2	Never smoked (go to number 10)							No		Yes	Yes	Yes	0.4	만명	Lung cancer Laryngeal cancer Stroke	Yes	3	동기부F 계획세우기 실천하기 평가하기 칭찬하기	니코틴 패치	10년	Yes	3
2016-12-07 17:54:42	F	24	P	3	Never smoked (go to number 10)									Yes	Yes	Yes	20	만명	Lung cancer Esophageal cancer Oropharyngeal cancer	Yes	3	.	.	20년	Yes	3
2016-12-07 17:57:04	F	24	P	1	Never smoked (go to number 10)									Yes	Yes	Yes			Lung cancer Stroke Esophageal cancer	No	4				No	2
2016-12-07 17:57:38	M	27	P	1	More than 100	Before entering medical school	cigarette	Smoked in the past, but not now (go to Number 7-3)			6년, 10개피, 2년			Yes	Yes	Yes	40	?	Lung cancer, Stroke, 심근경색	Yes	4		니코틴패치	10년	Yes	3
2016-12-07 17:58:37	F	27	P	3	Never smoked (go to number 10)									Yes	Yes	Yes	10	1000	Lung cancer LC Esophageal cancer	Yes	4	Ask assess advice arrange	Disulfiram Naltrexone Acamp...	20	Yes	4
2016-12-07 18:01:57	M	26	P	3	Never smoked (go to number 10)							No		Yes	Yes	Yes	35	60000	Lung cancer Laryngeal cancer 설암 COPD 버거씨병	Yes	5	Ask Asess Advise Assist Arrange	니코틴패치/껌 bupropion varenicline	5	Yes	3
2016-12-07 18:02:38	M	31	P	1	Never smoked (go to number 10)									Yes	Yes	Yes	30	50000	Lung cancer Laryngeal cancer Oropharyngeal cancer	Yes	3	ask advise assess assist arrange	니코틴 패치 니코틴 껌 니코틴 사탕	10년	Yes	3
2016-12-07 18:05:47	M	26	P	3	More than 100	Before entering medical school	말아 피우는 담배	Smoke every day (go to Number 7-1)	10			Yes	Not within six months, but I plan to quit smoking someday.	Yes	Yes	Yes	0.2	20만명	Lung cancer Esophageal cancer copd	Yes	4	고려전단계 고려단계 실행단계 유지단계	부스피론 날트렉손	15년	Yes	3
2016-12-07 18:06:29	M	29	P	4	Never smoked (go to number 10)									No	Yes	Yes	30%??	10000	Esophageal cancer Oropharyngeal cancer Lung cancer	Yes	4	Ask Assess Advise Assist Arrange	바레니클린 니코틴패치 부스피론	10년	Yes	4
2016-12-07 18:09:57	M	28	P	4	Never smoked (go to number 10)								Currently, I have no intention of quitting smoking at all.	Yes	Yes	Yes	30	10000	Lung cancer 방광암 Esophageal cancer	Yes	1	?	부프로피온 니코틴 패치 니코틴 껌	5	Yes	1
2016-12-07 18:10:03	M	27	P	4	Never smoked (go to number 10)									Yes	Yes	No	70	10만명	Lung cancer COPD 천식	Yes	3	5R	바레니클린 니코틴패치 부프로피온	15년	Yes	3
2016-12-07 18:10:24	F	27	P	4	Never smoked (go to number 10)									Yes	No	Yes	40	4000	Lung cancer 췌장암 간암	Yes	4		니코틴패치 부프로피온 바레니클린		Yes	3
2016-12-07 18:10:33	M	30	P	4	Never smoked (go to number 10)				0			No		Yes	Yes	No	50	100000		Yes	3
2016-12-07 18:11:26	M	28	P	4	Never smoked (go to number 10)									No	Yes	No				Yes	3
2016-12-07 18:11:40	F	28	P	4	Never smoked (go to number 10)				0					Yes	Yes	Yes			Lung cancer 심혈관질환 COPD	Yes	4		베라니클린 부프로피온 니코틴패치		No	2
2016-12-07 18:11:44	F	31	P	4	Never smoked (go to number 10)									Yes	Yes	Yes	30	10만명	COPD Lung cancer Laryngeal cancer	No	5	5R	부프로피온	7연	Yes	4
2016-12-07 18:12:23	M	31	P	4	Never smoked (go to number 10)									Yes	Yes	No	40	100000	암 copd 고혈압	Yes	1	의지확인 해로움 금연방해요소 금연시좋은점 요약	니코틴 ssri	오년	Yes	1
2016-12-07 18:12:49	F	27	P	4	Never smoked (go to number 10)									Yes	Yes	Yes	30	?	췌장암 방광암 Lung cancer	Yes	3		부프로피온 클로니딘 바레니클린	10	Yes	3
2016-12-07 18:13:01	M	28	P	4	Never smoked (go to number 10)									Yes	Yes	Yes	30	모름	Lung cancer 심뇌혈관질환 copd	Yes	4		니코틴패치 부푸로피온 바레니크린	40	Yes	3
2016-12-07 18:13:29	M	25	P	1	Never smoked (go to number 10)								Currently, I have no intention of quitting smoking at all.	Yes	Yes	No	70	5000명	Lung cancer Oropharyngeal cancer Laryngeal cancer	Yes	1	모릅니다	껌같은것 니코틴패치 액체담배..?	10~15년	Yes	2
2016-12-07 18:14:40	F	27	P	4	Never smoked (go to number 10)								1개월 안에 금연할 계획이 있다.	No	Yes	No	20	?		Yes	3		니코틴패치 아캄프로세이트 날트렉손	10	Yes	3
2016-12-07 18:15:22	F	28	P	4	Never smoked (go to number 10)								Currently, I have no intention of quitting smoking at all.	Yes	No	Yes			Lung cancer Esophageal cancer Laryngeal cancer	Yes	4	계획전 계획 준비 실행 유지	부프로피온 바레니클린
2016-12-07 18:15:42	M	26	P	4	Never smoked (go to number 10)									Yes	Yes	Yes	40	100000	암, COPD, 버거병	Yes	4	1. ask 2. assess 3. advice 4. assisit 5. arrange	니코틴패치, 껌, 부프로피온	10	Yes	3
2016-12-07 18:16:31	M	28	P	4	Less than 100	Before entering medical school	cigarette	Smoked in the past, but not now (go to Number 7-3)						Yes	Yes	No	30		Lung cancer copd 기관지천식	Yes	4				Yes	3
2016-12-07 18:18:28	M	28	P	3	More than 100	Before entering medical school	cigarette	Smoked in the past, but not now (go to Number 7-3)			5개비3년			Yes	Yes	Yes	0.3		Lung cancer 방광암 만성폐쇄성폐질환	Yes	4	고려전 고려 준비 실행 유지	챔픽스 껌 패치		Yes	4
2016-12-07 18:22:56	F	29	P	4	Never smoked (go to number 10)									Yes	Yes	Yes	70	100000	Lung cancer 방광암 Copd	Yes	5	.	바레니클린 부프로피온	10	Yes	3
2016-12-07 18:36:39	F	24	P	3	Never smoked (go to number 10)									Yes	Yes	Yes	50	10000명	Lung cancer 천식 췌장암	Yes	5					2
2016-12-07 18:37:03	M	29	P	4	Never smoked (go to number 10)									No	Yes	No	30	3만명	copd, Lung cancer, 폐렴	Yes	5	클리닉, 금연동료만들기, 주변에알리기	니코틴 패치, 금연 껌, bupropion	5년	Yes	4
2016-12-07 18:41:56	M	31	P	4	More than 100	Before entering medical school	cigarette	Smoked in the past, but not now (go to Number 7-3)			3년 10개비 10년			Yes	Yes	Yes	0.3	10만명	Lung cancer 방광암 Esophageal cancer	Yes	4	모름	뷰스피론	10년	Yes	3
2016-12-07 18:53:06	M	30	P	4	Less than 100									Yes	Yes	Yes	?	?	?	Yes	4	?	?	?	Yes	3
2016-12-07 18:54:12	M	26	P	4	Less than 100	1	cigarette	Smoked in the past, but not now (go to Number 7-3)			3개월			Yes	Yes	Yes	60	500000	Lung cancer,만성폐쇄성폐질환,Laryngeal cancer	Yes	4	.	부프로피온,니코틴패치,니코틴껌	10	No	3
2016-12-07 19:17:36	M	29	P	4	Never smoked (go to number 10)
2016-12-07 19:38:47	F	33	P	4	Never smoked (go to number 10)								1개월 안에 금연할 계획이 있다.	Yes	Yes	Yes				Yes	3	ㅑ		10	Yes	3
2016-12-07 19:49:13	M	36	P	4	More than 100	Before entering medical school	cigarette	Smoke every day (go to Number 7-1)	10개피			Yes	I plan to quit smoking within 6 months.	No	Yes	Yes	0.2	5만명 이상	Lung cancer copd 방광암	Yes	3	의지확인 의존정도 확인 증상확인 금단증상 의학적 상태 말하기, 금연권고, 도움주기, 경고하기, 다음내원 정하기	부프로피온(챔픽스), 니코틴 패치, 니코틴껌	1년	Yes	5
2016-12-07 19:55:39	M	26	P	3	Never smoked (go to number 10)									Yes	Yes	Yes	0.3	10만명	Lung cancer 허혈성 심장 질환 Stroke	Yes	3	Ask Assess Advise Assist Arrange	bupropion varenicline nicotine patch	15년	Yes	2
2016-12-07 20:32:27	F	23	D	2	Never smoked (go to number 10)									Yes	Yes	Yes	20	75000	Lung cancer, Laryngeal cancer, Stroke	Yes	4	Background Affect Trouble Handling Empathy	Bupropion	10	Yes	3
2016-12-07 21:10:45	M	27	P	4	Never smoked (go to number 10)									No	Yes	Yes	45	150000	Lung cancer COPD 방광암	Yes	2	격려 등	바레니클린 부프로피온 니코틴패치	5	Yes	2
2016-12-07 21:13:02	F	23	P	1	Never smoked (go to number 10)							No		Yes	Yes	No			Lung cancer Esophageal cancer	Yes	5				Yes	4
2016-12-07 21:43:10	F	28	P	4	Never smoked (go to number 10)									No	Yes	Yes	30	5만	Lung cancer COPD 버거씨병	Yes	3		니코틴 패치 니코틴 껌 부프로피온	7	Yes	3
2016-12-07 22:52:37	M	27	P	4	Never smoked (go to number 10)									Yes	Yes	No	30	50만	Lung cancer Laryngeal cancer 방광암	Yes	4	계획전 계획 실행 유지	바레니클린 니코틴패치 니코틴껌	3년	Yes	2
2016-12-08 03:34:24	M	28	P	1	More than 100	Before entering medical school	cigarette 무연담배(스누스, 스너프, 씹는 담배 등)	Smoke every day (go to Number 7-1)	10			Yes	I plan to quit smoking within 6 months.	Yes	Yes	Yes	0.4	100	Lung cancer Laryngeal cancer Stroke	Yes	3		니코틴껌 니코틴패치	5년	No	4
2016-12-08 08:44:23	F	27	P	4	Never smoked (go to number 10)									No	Yes	Yes	20	100만	Lung cancer 기관지 확장 위궤양	Yes	3		부푸로피온 니코틴 패치 바래니클린	10	Yes	3
2016-12-08 10:03:58	F	25	P	3	Never smoked (go to number 10)									Yes	Yes	Yes	40	300	Lung cancer, COPD, Laryngeal cancer	Yes	2	5R (Relevance, Risk, Reward, Roadblock, Repetition)	니코틴 패치	40	Yes	2
2016-12-08 10:30:39	M	20	D	1	Never smoked (go to number 10)									Yes	Yes	No	0.25	300	Lung cancer, COPD	Yes	2				Yes	4
2016-12-08 11:32:53	M	32	K	3	More than 100	Before entering medical school	cigarette	Smoked in the past, but not now (go to Number 7-3)			10년 20개비 2년			Yes	Yes	No	50	10000	만성폐쇄성 폐질환 Lung cancer 뇌경색	Yes	2		니코틴패치 Electronic cigarette	30년	No	2
2016-12-08 11:32:57	M	24	K	3	More than 100	Before entering medical school	cigarette Electronic cigarette	Smoke every day (go to Number 7-1)	10			Yes	Not within six months, but I plan to quit smoking someday.	Yes	Yes	No	60	1000000	Lung cancer COPD Laryngeal cancer	Yes	4		Varenicline Bupropion 니코틴 패치	10년	Yes	2
2016-12-08 11:36:20	M	27	K	3	Never smoked (go to number 10)									Yes	Yes	No	0.4	10만명	Lung cancer Esophageal cancer copd	Yes	3		Varenicline Nicotin Naloxone	5년	Yes	2
2016-12-08 11:37:40	M	25	K	3	Never smoked (go to number 10)	1	cigarette	Smoke every day (go to Number 7-1)	2-4개피			No	Not within six months, but I plan to quit smoking someday.	Yes	Yes	No	모른다	모른다	Lung ca. Obstructive lung ds.	Yes	3	모른다	정신과때배웠는데.. 기억이안납니다		Yes	1
2016-12-08 11:37:54	M	23	K	3	Never smoked (go to number 10)									No	Yes	No	24	50000	Lung cancer COPD Stroke	Yes	4	5R relevance risk rewards roadlock repetition	니코틴 껌	15년	Yes	3
2016-12-08 11:38:22	M	25	K	3	Never smoked (go to number 10)								Currently, I have no intention of quitting smoking at all.	Yes	Yes	No				Yes	3					3
2016-12-08 11:43:24	F	23	K	3	Never smoked (go to number 10)									Yes	No	No	잘 몰라요	잘 몰라요	Lung cancer Oropharyngeal cancer COPD	Yes	5	잘 몰라요	부프로피온 Varenicline 니코틴 패치	10년	Yes	1
2016-12-08 11:45:14	F	23	K	3	Never smoked (go to number 10)									Yes	Yes	No	30	10만명	Lung cancer copd Oropharyngeal cancer	Yes	1		부스피론 바네리클린	10년	Yes	1
2016-12-08 11:58:40	F	24	K	3	Never smoked (go to number 10)									Yes	Yes	No	20		Lung cancer Laryngeal cancer Oropharyngeal cancer		2		부프로피온 날트렉손	5년	No	2
2016-12-08 11:59:03	M	24	K	3	Never smoked (go to number 10)									Yes	Yes	No	40	6500000	Lung cancer Laryngeal cancer COPD	Yes	3		Acamprosate Disulfiram Naltrexone	5	No	2
2016-12-08 11:59:35	F	24	K	3	Never smoked (go to number 10)									Yes	Yes	Yes	0.15	10만명	Lung cancer Laryngeal cancer Oropharyngeal cancer	Yes	2		부프로피온 날트록센 패치	10년	Yes	2
2016-12-08 12:03:34	M	25	K	3	More than 100	Before entering medical school	cigarette Electronic cigarette	Smoke every day (go to Number 7-1)	10			Yes	Not within six months, but I plan to quit smoking someday.	Yes	Yes	Yes			Lung cancer, copd, Stroke	Yes	3		니코틴 패치, 니코틴껌,	10	Yes	1
2016-12-08 12:03:52	M	23	K	2	Never smoked (go to number 10)									Yes	Yes	No	40	모름	Lung cancer Laryngeal cancer 인두암	Yes	2				Yes	2
2016-12-08 12:03:54	F	24	K	2	Never smoked (go to number 10)									No	Yes	No			Lung cancerscc Laryngeal cancer Oropharyngeal cancer 췌장암 인두암 골다공증 Cataract	Yes	3		패치 Electronic cigarette..?	1년?	Yes	3
2016-12-08 12:08:19	M	24	K	2	Never smoked (go to number 10)								Currently, I have no intention of quitting smoking at all.	Yes	Yes	No	50	0	기관지암 구강상피암 Laryngeal cancer	Yes	3		nicotine. bupropion. ssri	1년	No	2
2016-12-08 12:08:40	M	23	K	2	Never smoked (go to number 10)									Yes	Yes	No	70	10000	COPD, pulmonary cancer, oral cancer	Yes	3	제시 부탁 권고 협박 강제	니코틴 패치	15	Yes	3
2016-12-08 12:08:59	M	21	K	2	Never smoked (go to number 10)							Yes		Yes	Yes	No
2016-12-08 12:09:24	M	22	K	2	Never smoked (go to number 10)				0					Yes	Yes	No	0.3	?	Lung cancer Laryngeal cancer 기관지암	Yes	5	경고 회유 위협	금연껌 니코틴패치 은단	5	Yes	1
2016-12-08 12:12:12	F	22	K	2	Never smoked (go to number 10)									Yes	Yes	No	0.43	6만명	호흡기계질환, 악성종양, 심혈관계질환	Yes	5	계획전단계, 계획단계,준비단계,실행단계,유지단계	니코틴보충제, 정신작용제(bupropion), 니코틴부분효능제	15년	Yes	3
2016-12-08 12:12:26	M	25	K	2	Never smoked (go to number 10)									No	Yes	No	85	흡연 관련사망자로 600만명	뇌경색 동맥경화 뇌출혈	Yes	3			5년	No	2
2016-12-08 12:28:57	M	23	K	3	Never smoked (go to number 10)									No	Yes	Yes	20	500000	Laryngeal cancer 천식 Lung cancer	Yes	2	-	니코틴 패치 금연초 등 대체제 날트렉손	10	Yes	2
2016-12-08 12:31:52	M	21	K	2	Never smoked (go to number 10)									No	Yes	No	25	50000	Lung cancer Stroke 당뇨	Yes	3	모르겠습니다	varenicline nicotine patch bupropion	10년	Yes	1
2016-12-08 12:33:09	M	24	K	3	Never smoked (go to number 10)									Yes	Yes	No	20	10000	Lung cancer 뇌졸증 Polycytemia vera	Yes	2
2016-12-08 12:33:11	M	22	K	2	More than 100	Year 1		Smoked in the past, but not now (go to Number 7-3)			1.5년, 1~2개비, 2년			Yes	Yes	No	30	?	관상동맥질환 Lung cancer	No	3	?	니코틴 패치	5년	Yes	2
2016-12-08 12:40:45	M	22	K	1	Never smoked (go to number 10)									Yes	Yes	No	잘 모르겠습니다	잘 모르겠습니다	Lung cancer Oropharyngeal cancer	Yes	2	잘 모르겠습니다	니코틴 패치?	잘 모르겠습니다	Yes	1
2016-12-08 12:41:24	F	21	K	1	Never smoked (go to number 10)									Yes	No	No	30	1500	Lung cancer 설암 Esophageal cancer	Yes	2			6	Yes	1
2016-12-08 12:44:07	M	25	K	1	Never smoked (go to number 10)									Yes	Yes	No	0.3	300명	Lung cancer Laryngeal cancer 인두암...	Yes	3		니코틴 패치	2년	No	1
2016-12-08 12:44:52	F	22	K	1	Never smoked (go to number 10)									Yes	Yes	No					3
2016-12-08 12:47:06	F	22	K	1	Never smoked (go to number 10)									Yes	No	No	30%?	10000명?	Lung cancer Esophageal cancer Laryngeal cancer	Yes	3	몰라요	니코틴 패치	10년이상?	No	3
2016-12-08 12:49:37	M	26	K	3	More than 100	Before entering medical school	cigarette	Smoke every day (go to Number 7-1)	13			Yes	Currently, I have no intention of quitting smoking at all.	No	Yes	Yes	0.2	잘모르겠다	Lung cancer 역류성식도염 궤양	Yes	3		바레니클린 니코틴보조제	10년	Yes	4
2016-12-08 12:55:03	M	21	K	1	Never smoked (go to number 10)									Yes	Yes	Yes
2016-12-08 13:02:11	F	22	K	1	Never smoked (go to number 10)	1			0			No		No	Yes	Yes	50	100	Lung cancer 기관지암 Oropharyngeal cancer	Yes	3
2016-12-08 13:15:06	M	22	K	1	Never smoked (go to number 10)				0					Yes	Yes	No	30	3000	암 폐쇄성 폐 질환 심질환	Yes	4		니코틴 패치 Electronic cigarette	30	Yes	2
2016-12-08 13:19:50	F	28	K	3	Never smoked (go to number 10)									Yes	Yes	No	0.24	75910명	Lung cancer, Stroke, 허혈성 심장질환	Yes	3	5R 5S	니코틴 대체요법, 웰부트린, 챔픽스	5년	Yes	3
2016-12-08 13:55:31	M	23	K	3	Never smoked (go to number 10)				0					Yes	Yes	No	15	20000	COPD Lung cancer Cardiovascular disease	Yes	3	금연의 이점 교육 흡연의 해로움 교육 금연시 금단증상 교육 흡연욕구 충동시 대처법 교육 외래통원 기간 교육	니코틴 패치 Bupropion Vareniciline	15	No	3
2016-12-08 13:57:23	M	23	K	3	Never smoked (go to number 10)				0					Yes	Yes	Yes	0.7	10000	Esophageal cancer Lung cancer copd	Yes	4	잘 모르겠습니다 죄송합니다 교수님 공부해보겠습니다	Varenicline Bupropion Venlafaxine	10년	Yes	2
2016-12-08 14:05:10	M	24	K	3	Never smoked (go to number 10)							No		Yes	Yes	Yes	20	3만	COPD LUNGCANCER STROKE	Yes
2016-12-08 14:05:29	M	23	K	3	Less than 100	Before entering medical school		Smoked in the past, but not now (go to Number 7-3)			1개월 하루 3개비			Yes	Yes	No	20			Yes	4				Yes	2
2016-12-08 14:07:54	M	24	K	3	More than 100	3	cigarette	Smoke every day (go to Number 7-1)	5			No	Currently, I have no intention of quitting smoking at all.	Yes	Yes	Yes	0.2	모르겠어요	Lung cancer Bladder cancer Laryngeal cancer	Yes	1	Precontemplation Contemplation Preparation Action Maintenance Relapse	Varenicline Bupropion	10years 이상	Yes	2
2016-12-08 14:39:49	M	22	K	1	Never smoked (go to number 10)									Yes	Yes	No	60				3				Yes	3
2016-12-08 15:03:32	M	24	K	3	Never smoked (go to number 10)									Yes	Yes	Yes	40	10만명	Lung cancer Oropharyngeal cancer Copd	Yes	5		니코틴 패치	10년	Yes	2
2016-12-08 15:12:11	M	23	K	3	Never smoked (go to number 10)									Yes	Yes	Yes	30	10000	Lung cancer copd 동맥경화	Yes	3		니코틴패치	20년	Yes	2
2016-12-08 15:13:00	M	23	K	1	Less than 100	Before entering medical school	cigarette	Smoke occasionally (go to Number 7-2)		7일 4개비		Yes	1개월 안에 금연할 계획이 있다.	Yes	Yes	No	0.3	?	Lung cancer Oropharyngeal cancer 고혈압	Yes	4		니코틴 패치 피우는 비타민	10년	Yes	3
2016-12-08 15:28:15	M	27	P	3	Never smoked (go to number 10)							No	Currently, I have no intention of quitting smoking at all.	Yes	Yes	Yes	30	20000	Lung cancer Laryngeal cancer 뇌졸증	Yes	3	risk relavance repetiton reward	bupropion 니코틴패치 껌	15	No	3
2016-12-08 17:28:48	M	22	K	3	Never smoked (go to number 10)									Yes	Yes	No	30	.	Oropharyngeal cancer Stroke Lung cancer	Yes	2		Naltrexone Nicotine patch	15년	No	3
2016-12-09 01:03:00	M	22	K	1	Never smoked (go to number 10)									Yes	Yes	No	50	10만명	Lung cancer Esophageal cancer 전립선암	Yes	3	모르겠네요	니코틴 껌,패치 약물은 모르겠네요	모르겠습니다	Yes	2
2016-12-09 02:54:06	M	26	K	2	More than 100	Before entering medical school	cigarette Electronic cigarette	Smoke every day (go to Number 7-1)	Electronic cigarette			Yes	Not within six months, but I plan to quit smoking someday.	No	Yes	No	30	모르겠습니다	심혈관계질환 호흡기계질환 인후두비강질환				챔픽스(varenicline) Bupropion	10	Yes	4
2016-12-09 13:54:27	M	28	P	3	More than 100	Before entering medical school	cigarette	Smoke every day (go to Number 7-1)	15			Yes	Currently, I have no intention of quitting smoking at all.	Yes	Yes	Yes	0.3	500	Copd Cancer	Yes	2				Yes	5
2016-12-10 15:39:34	F	23	P	1	Never smoked (go to number 10)							No		Yes	Yes	Yes			Lung cancer	Yes	3				Yes	2
2016-12-10 15:40:17	M	27	P	1	Never smoked (go to number 10)									Yes	Yes	Yes	0.4	3만명	Lung cancer Laryngeal cancer Oropharyngeal cancer	Yes	5		부프론피온	10	Yes	3
2016-12-10 15:41:07	M	24	P	1	Never smoked (go to number 10)				0					Yes	Yes	Yes	30	300000	Lung cancer 뇌졸증	Yes	3			30	Yes	3
2016-12-10 15:41:22	M	23	P	2	More than 100	Before entering medical school	cigarette	Smoke every day (go to Number 7-1)	17			No	1개월 안에 금연할 계획이 있다.	Yes	Yes	Yes	30	40000	Lung cancer Oropharyngeal cancer 설암	Yes	3	모르겟습니다	니코틴패치	10	Yes	1
2016-12-10 15:42:34	F	28	P	1	Never smoked (go to number 10)									Yes	Yes	Yes	0.25	이만명	Lung cancer, 위암, Esophageal cancer	No	3	Risk Relevance reward roadblock reception	니코틴패치 챔픽스 Electronic cigarette	계속	No	1
2016-12-10 15:43:15	M	25	P	1	Never smoked (go to number 10)									Yes	Yes	Yes	40	7000	Lung cancer Esophageal cancer Laryngeal cancer	Yes	4				Yes	4
2016-12-10 15:44:40	M	24	P	1	Never smoked (go to number 10)									Yes	Yes	Yes	0.3	5만명	소세포성Lung cancer, Esophageal cancer, Oropharyngeal cancer	Yes	4	-	nicotin patch nicotin gum	5년	No	3
2016-12-10 15:45:03	M	24	P	1	Never smoked (go to number 10)	Yes과 1학년		Smoked in the past, but not now (go to Number 7-3)						Yes	Yes	Yes	40	10000	Lung cancer Oropharyngeal cancer Stroke	Yes	3			10년	Yes	3
2016-12-10 15:46:21	F	30	P	1	Never smoked (go to number 10)				0			No		Yes	Yes	Yes	모름	모름	Lung cancer 후둥암 기형	Yes	2				Yes	2
2016-12-10 15:46:45	M	22	P	1	More than 100	Before entering medical school	cigarette	Smoke every day (go to Number 7-1)	10			Yes	Not within six months, but I plan to quit smoking someday.	Yes	Yes	Yes	40	50000	Lung cancer Laryngeal cancer Oropharyngeal cancer	Yes	5		니코틴패치 금연껌 물	2	Yes	3
2016-12-10 15:48:09	F	26	P	1	Never smoked (go to number 10)	Before entering medical school								Yes	Yes	Yes	20	5000	Lung cancer 기관지염 면역저하	Yes	1	assessment advice ask	니코틴제제		No	1
2016-12-10 15:48:16	M	26	P	1	Never smoked (go to number 10)									No	Yes	Yes	14	~	암, 폐렴, 심장질환	Yes	5
2016-12-10 15:48:22	M	24	P	1	Never smoked (go to number 10)				0					Yes	Yes	Yes	43.1	75910	호흡계질환, 암, 심혈관계질환	Yes	5				No	5
2016-12-10 15:48:27	M	28	P	1	More than 100	Before entering medical school	cigarette	Smoke every day (go to Number 7-1)	10			Yes	Currently, I have no intention of quitting smoking at all.	Yes	Yes	Yes	30	100000	Lung cancer 폐부종 폐협착	Yes	5	자극 상담 적극적도움 물리적도움 심리적도움	니코틴패치 니코틴껌 Electronic cigarette	2	Yes	5
2016-12-10 15:48:30	M	26	P	1	More than 100	Before entering medical school	cigarette	Smoked in the past, but not now (go to Number 7-3)			3년, 1개비			Yes	Yes	Yes	30	?	Lung cancer 폐기종 Esophageal cancer	Yes	5	?	?	10년	Yes	2
2016-12-10 15:49:12	F	23	P	1	Never smoked (go to number 10)									Yes	Yes	Yes
2016-12-10 15:49:20	F	24	P	1	Never smoked (go to number 10)									Yes	Yes	No	25	?	Lung cancer 전립선암 Colon cancer	Yes	1	?	?	?	Yes	2
2016-12-10 15:49:21	M	22	P	1	Never smoked (go to number 10)									Yes	Yes	Yes					4
2016-12-10 15:49:25	F	26	P	1	Never smoked (go to number 10)									Yes	Yes	Yes	30	모르겠다	Lung cancer Copd	Yes	3	모르겠다	모르겠다	3	Yes	3
2016-12-10 15:49:35	M	24	P	1	Never smoked (go to number 10)									No	Yes	Yes	30	1000	Lung cancer COPD 폐렴	Yes	3			5	Yes	1
2016-12-10 15:50:11	M	23	P	1	More than 100	Before entering medical school	cigarette	Smoke every day (go to Number 7-1)	10			No	I plan to quit smoking within 6 months.	No	Yes	Yes	30	만명	Lung cancer 유방암 Colon cancer	Yes	3	모릅니다	껌 패치 등등	1년	Yes	3
2016-12-10 15:50:51	M	26	P	1	Never smoked (go to number 10)									Yes	Yes	Yes	15	20000	Lung cancer copd	Yes	4	5A	.	5	Yes	4
2016-12-10 15:52:34	M	26	P	1	More than 100	Before entering medical school	cigarette	Smoke every day (go to Number 7-1)	10			Yes	1개월 안에 금연할 계획이 있다.	Yes	Yes	Yes	0.3	3만5천명	인Laryngeal cancer. Lung cancer. Oropharyngeal cancer	Yes	1	흡연F부. 금연요청. 금연의지묻기. 금연하는데 도움주고. Follow up. 다음 상담 날짜 잡기	니코틴껌. 니코틴패치. 챔픽스	15년정도?	Yes	2
2016-12-10 15:52:44	F	24	P	1	Never smoked (go to number 10)				0					Yes	Yes	Yes	40	15만	Lung cancer copd Colon cancer	Yes	4	?	?	5년	Yes	2
2016-12-10 15:52:53	M	24	P	1	Less than 100	Before entering medical school	cigarette	Smoked in the past, but not now (go to Number 7-3)			1개월, 0.1개비, 5년			Yes	Yes	No			Lung cancer	Yes	3				Yes	2
2016-12-10 15:53:20	M	23	K	1	Never smoked (go to number 10)									No	Yes	Yes	모름	모름	모름
2016-12-10 15:53:27	M	28	P	1	More than 100	Before entering medical school	Electronic cigarette	Smoke every day (go to Number 7-1)	7			Yes	Not within six months, but I plan to quit smoking someday.	Yes	Yes	Yes	30	50만명	Stroke 암 폐기종	Yes	4	모름	금연검 금연패치	7	Yes	4
2016-12-10 15:53:27	M	27	P	1	Never smoked (go to number 10)	Before entering medical school	cigarette	Smoked in the past, but not now (go to Number 7-3)			안피움			Yes	Yes	Yes	30	만명	Laryngeal cancer Lung cancer Esophageal cancer	Yes	3	모름	니코틴 패치, 니코틴 껌	10	Yes	3
2016-12-10 15:53:50	F	24	P	1	Never smoked (go to number 10)									Yes	Yes	No			Lung cancer Oropharyngeal cancer Laryngeal cancer	Yes	4	ask advise allow assessment arrangement		5	Yes	2
2016-12-10 15:53:52	M	27	P	1	More than 100	1	Hookah	Smoke every day (go to Number 7-1)	10			Yes	Not within six months, but I plan to quit smoking someday.	Yes	Yes	Yes	20	25만명	Lung cancer Esophageal cancer Oropharyngeal cancer	Yes	1	잘모르겟습니다	챔픽스 니코틴패치	10년	Yes	2
2016-12-10 15:55:22	M	24	P	1	Never smoked (go to number 10)									Yes	Yes	Yes
2016-12-10 15:55:25	F	24	P	1	Never smoked (go to number 10)									Yes	Yes	Yes	0.2	5만명	Lung cancer 폐렴 Colon cancer	Yes	4	ask assess advise assist arrange	니코틴패치 웰부트린 챔픽스	10년	No	3
2016-12-10 15:58:51	F	22	P	1	Never smoked (go to number 10)									Yes	Yes	Yes	24	75919	Lung cancer 췌장암 Laryngeal cancer	Yes	3	ask, assess, advise, assist, arrange	부푸로피온, 니코틴 패치, 니코틴 검	3	Yes	3
2016-12-10 16:01:30	F	25	P	1	Never smoked (go to number 10)				0					Yes	Yes	Yes					2				Yes
2016-12-10 16:02:59	F	25	P	2	Never smoked (go to number 10)				0			Yes		Yes	Yes	Yes	모름	모름	암 Stroke	Yes	4	모름	Electronic cigarette	모름	Yes	3
2016-12-10 16:03:46	F	24	P	1	Never smoked (go to number 10)	1						No	1개월 안에 금연할 계획이 있다.	No	Yes	Yes	30	100		Yes	5				Yes	5
2016-12-10 16:06:53	F	26	P	1	Never smoked (go to number 10)									Yes	Yes	No	?	?	Lung cancer 간암 Laryngeal cancer	Yes	1	?	?	?	Yes	1
2016-12-10 16:07:17	M	24	P	1	Never smoked (go to number 10)									Yes	Yes	Yes	40	?	Lung cancer Laryngeal cancer 폐렴	Yes	3	.	.	10	Yes	2
2016-12-10 16:09:21	F	25	P	1	Never smoked (go to number 10)							No		Yes		Yes				Yes	4	ask			Yes	2
2016-12-10 16:09:47	F	25	P	1	Never smoked (go to number 10)									Yes	Yes	Yes				Yes	4				Yes	3
2016-12-10 16:12:36	M	33	P	1	More than 100	Before entering medical school	cigarette	Smoked in the past, but not now (go to Number 7-3)			1년, 10개비, 10년			Yes	Yes	Yes	30	십만명	COPD lung cancer	Yes	4	assign arrange assist				3
2016-12-10 16:12:39	F	24	P	1	Never smoked (go to number 10)
2016-12-10 16:16:25	F	24	P	1	Never smoked (go to number 10)							No	Currently, I have no intention of quitting smoking at all.	No	Yes	Yes					4				No	4
2016-12-10 16:20:26	M	25	P	1	Never smoked (go to number 10)									Yes	Yes	Yes	0.393	58000	호흡기 질환	Yes	4	Advise assign ask arrange assessment	패치	10	Yes	3
2016-12-10 16:36:55	M	32	P	1	More than 100	Before entering medical school	Electronic cigarette	Smoke every day (go to Number 7-1)	0			Yes	1개월 안에 금연할 계획이 있다.	No	No	No	90	10000	모릅니다	Yes	3	잘 모릅니다	전담	10	No	3
2016-12-10 16:40:00	F	27	P	1	Never smoked (go to number 10)									Yes	Yes	Yes	30	천면	Lung cancer	Yes	4			3년	Yes	1
2016-12-10 16:40:38	F	24	P	1	Never smoked (go to number 10)				0					No	Yes	Yes	30	2만	Lung cancer 설암 Laryngeal cancer	Yes	3	모르겠다	모르겠다	15	Yes	2
2016-12-10 16:46:48	M	25	P	1	Never smoked (go to number 10)									No	Yes	Yes	40	10000	Lung cancer Stroke Laryngeal cancer	Yes	4	모름	모름	모름	Yes	3
2016-12-10 17:16:22	M	29	P	1	Never smoked (go to number 10)				0					Yes	Yes	Yes	?	?	COPD	Yes	4	?`	?	?	No	2
2016-12-10 17:19:25	F	24	P	1	Never smoked (go to number 10)									Yes	Yes	Yes				Yes	4				No	3
2016-12-10 17:25:00	F	25	P	1	Never smoked (go to number 10)									Yes	Yes	Yes	0.5				3				Yes	3
2016-12-10 17:26:11	M	26	P	1	Never smoked (go to number 10)									Yes	Yes	Yes	모름	모름	Lung cancer,Oropharyngeal cancer,	Yes	3	모름	금연패치,	모름	Yes	3
2016-12-11 20:42:57	M	27	P	4	Never smoked (go to number 10)									No	Yes	No	50	100	Lung cancer	Yes	4				Yes	3
2016-12-12 06:44:42	M	24	K	2	Never smoked (go to number 10)									Yes	Yes	No	40	10만	Lung cancer 폐기종 copd	Yes	3	모른다	니코틴패치 잘 모른다	20년	No	1
2016-12-12 09:16:38	M	25	D	4	Never smoked (go to number 10)									Yes	Yes	Yes	0.42195	흡연으로 인해 발생하는 폐질환의 비교위험도는 모르겠습니다	Oropharyngeal cancer 기관지암 Lung cancer	Yes	5	Ask assess assist arrange advice	니코틴패치 부프프로피온 챔픽스	10년	Yes	5
2016-12-12 09:17:02	M	24	D	4	Never smoked (go to number 10)							No	Currently, I have no intention of quitting smoking at all.	Yes	Yes	Yes	40	10000	암 COPD 심뇌혈관질환	Yes	4	Ask assess assist advise arrange	바레니클린 부프로피온 니코틴패치		Yes	3
2016-12-12 09:20:24	M	24	D	4	Never smoked (go to number 10)									Yes	Yes	Yes	0.35	3000명	만성폐쇄성폐질환 Lung cancer 방광암	Yes	4	Ask Assessment Advice Assist Arrange	Varenicline Bupropion	15년	Yes	3
2016-12-12 09:21:08	M	30	D	4	More than 100	Before entering medical school	cigarette	Smoked in the past, but not now (go to Number 7-3)			10년 10개비			Yes	Yes	Yes	70	십만먙	Lung cancer COPD 기흉	Yes	5	RISK REWARD REPETITION RE R	Varenicline Bupropion Nicotine patch gum	10000000년	Yes	3
2016-12-12 09:22:16	M	33	D	4	More than 100	Before entering medical school	cigarette	Smoked in the past, but not now (go to Number 7-3)			3년,20개비,12년			Yes	Yes	Yes	0.3	30000	Lung cancer, Laryngeal cancer, 방광암	Yes	4	5a	바레니클린, 니코틴 껌, 니코틴 패치	5년	Yes	3
2016-12-12 09:24:41	M	26	D	4	Never smoked (go to number 10)									No	Yes	Yes	30	50만	Lung cancer	Yes	5	Ask assess advice assist arrange	항우울제	No	Yes	5
2016-12-12 09:26:14	M	27	D	4	Never smoked (go to number 10)	Before entering medical school	cigarette	Smoked in the past, but not now (go to Number 7-3)						Yes	Yes	Yes	0.3	5000명	Lung cancer 만성폐쇄성폐질환 Stroke	Yes	4	ask assess advise assist arrange	varenicline bupropion clonidine	1년	Yes	4
2016-12-12 09:32:24	M	23	D	4	Less than 100	Yes과 2학년	cigarette Electronic cigarette	Smoked in the past, but not now (go to Number 7-3)			5년 7개비 100일			Yes	Yes	Yes	0.3	50000명	Lung cancer 췌장암 CHD	Yes	3	Ask Assessment Advice Arrangement	Bupropion Varenicline 니코틴 패치	10년	Yes	4
2016-12-12 09:42:09	F	23	D	3	Never smoked (go to number 10)									No	Yes	Yes	50	250000	만성폐쇄성폐질환. 심근경색. Lung cancer	Yes	3	동기부F. 목표설정.	부프로피온. 니코틴패치.	10	Yes	1
2016-12-12 09:44:49	M	27	D	3										Yes	Yes	No	0.3	100000	Lung cancer 폐렴 신장암	Yes	2		니코틴패치 니코틴검	5년	No	1
2016-12-12 09:47:16	F	25	D	3	Never smoked (go to number 10)	3	Electronic cigarette		0			No	Currently, I have no intention of quitting smoking at all.	Yes	Yes	Yes	30	100	Lung cancer, COPD, MI	Yes	3	Ask Assess Assist Advise Arrangement	니코틴껌, 니코틴패치, 부프로피온	3년	Yes	1
2016-12-12 10:17:50	F	27	D	4	Never smoked (go to number 10)							No		Yes	Yes	Yes	50	10000	Stroke Lung cancer 심근경색	Yes	2	조력자 방해자 금연의 이득 흡연의 위험성 격려	바레니클린 니코틴패치 니코틴껌	5	Yes	4
2016-12-12 11:20:13	M	25	D	3	Never smoked (go to number 10)									Yes	Yes	Yes	0.3	10만명?	Lung cancer Laryngeal cancer Oropharyngeal cancer	Yes	4		Electronic cigarette니코틴껌	5년	Yes	2
2016-12-12 11:41:10	M	24	D	4	Never smoked (go to number 10)									Yes	Yes	Yes	0.4	6만명	Lung cancer,Laryngeal cancer,만성췌장염	Yes	3	고려전단계,고려단계,준비단계,실행단계,유지단계	varenicline,bupropione,니코틴패치	30년	No	4
2016-12-12 12:29:40	F	28	D	4	Never smoked (go to number 10)							No		Yes	Yes	Yes	0.3	100000	copd cancer cva	Yes	3		바레니클린 니코틴패치 부프로피온	5	Yes	3
2016-12-12 12:31:24	M	31	D	4	More than 100	Before entering medical school	cigarette	Smoke every day (go to Number 7-1)	12			Yes	I plan to quit smoking within 6 months.	Yes	Yes	Yes	50	15000	Lung cancer 천식 만성호흡곤란	Yes	4	5p	패치 껌 바레니클린	10	Yes	5
2016-12-12 12:50:10	M	27	D	3	Less than 100	Before entering medical school	cigarette	Smoked in the past, but not now (go to Number 7-3)			1갑/월			Yes	Yes	Yes	0.5	1만	Lung cancer 폐기종 기관지염	Yes	3	모름	니코틴패치	1	Yes	5
2016-12-12 12:58:13	M	30	D	4	Never smoked (go to number 10)									Yes	Yes	Yes	0.7		고혈압 당뇨 심뇌혈관질환	Yes	4		varenicline bupropion	5년	Yes	3
2016-12-12 13:40:42	F	23	D	3	Never smoked (go to number 10)									Yes	Yes	Yes	10	5000	Lung cancer Laryngeal cancer Oropharyngeal cancer	No	5				Yes	1
2016-12-12 13:42:06	M	28	D	3	Never smoked (go to number 10)									Yes	Yes	No	60	20만	COPD Lung cancer Laryngeal cancer	Yes	4	모름	니코틴패치 은단 금연초	3	Yes	2
2016-12-12 14:06:16	M	24	D	4	Never smoked (go to number 10)								1개월 안에 금연할 계획이 있다.	Yes	Yes	Yes	모른다. 40%?	모른다.	고지혈증, 심뇌혈관질환, 거의 모든 종류의 신생물	Yes	4	흡연시 생기는 문제점 확인 도와줄수있는 주변 지원 확인 방해물 확인 금연시 얻는 이득 인지 치료 및 금단 증상 교육	니코틴 패치 챔픽스 부스피론	10년	Yes	4
2016-12-12 14:49:55	M	24	D	4	Never smoked (go to number 10)									No	Yes	Yes			Lung cancer Esophageal cancer 위암	Yes	4		Varenicline bupropion	10년	Yes	5
2016-12-12 14:50:44	M	32	D	4	More than 100	Before entering medical school	cigarette	Smoke occasionally (go to Number 7-2)		10일 8개피		Yes	1개월 안에 금연할 계획이 있다.	Yes	Yes	Yes	0.4	십만명	Lung cancer Laryngeal cancer copd	Yes	4	ask assess advice assist	varenicline bupropion nicotine patch	10년	Yes	4
2016-12-12 15:38:12	F	24	D	4	Never smoked (go to number 10)									Yes	Yes	Yes	0.25	0.2	Lung cancer,Stroke,허혈성심질환	Yes	4	5A(ask advise assess assist arrange)	Varenicline bupropion NRT(껌,패치 등)	15년	Yes	4
2016-12-12 16:26:51	M	27	D	3	More than 100	Before entering medical school	cigarette	Smoke every day (go to Number 7-1)	12			No	I plan to quit smoking within 6 months.	Yes	Yes	Yes	40	100000	Lung cancer COPD Laryngeal cancer Esophageal cancer Oropharyngeal cancer 설암	Yes	3		패치	10년	Yes	3
2016-12-12 17:13:20	F	29	D	3	Never smoked (go to number 10)									No	Yes	No	30	1000	만성폐쇄성폐질환 Laryngeal cancer Lung cancer	Yes	3	잘 모르겠습니다	니코틴 패치	5	No	2
2016-12-12 17:14:13	M	23	D	3	Never smoked (go to number 10)									Yes	Yes	Yes	60	2000	Copd cancer	Yes	4				Yes	3
2016-12-12 17:42:00	M	24	D	3	More than 100	Before entering medical school	말아 피우는 담배	Smoked in the past, but not now (go to Number 7-3)			중학교 3년, 재수 1년, 1 1년 2일 반갑 정도 2 때 금연 시작			Yes	Yes	No	70	100	Lung cancer	Yes	4	모른다	니코틴패치 금연껌	5년	No	3
2016-12-12 17:59:11	M	24	D	3	More than 100	1	cigarette	Smoke every day (go to Number 7-1)	6			No	Not within six months, but I plan to quit smoking someday.	Yes	Yes	Yes	25	10만명	Lung cancer copd 방광암	Yes	4		니코틴패치 Electronic cigarette	10년	Yes	1
2016-12-12 19:08:59	F	29	D	3	Never smoked (go to number 10)									Yes	Yes	No	0.5								No	3
2016-12-12 19:24:17	M	28	D	3	Never smoked (go to number 10)									Yes	Yes	Yes				Yes	3		니코틴 날록손 니코틴패치	20년	Yes	3
2016-12-13 02:42:11	M	27	D	3	More than 100	Before entering medical school	cigarette	Smoked in the past, but not now (go to Number 7-3)			10개피 2년			No	Yes	Yes	0.3	10만명	Lung cancer Stroke 위암	Yes	5	계획전단계 계획단계 준비단계 실행단계 유지단계	니코틴 보조제(껌, 흡입제, 패치) 정신작용제 니코틴부분효능제	10년	Yes	3
2016-12-14 15:28:59	M	26	P	2	Never smoked (go to number 10)									Yes	Yes	Yes				Yes	3			불가능	Yes	3
2016-12-14 15:30:46	F	25	P	2	More than 100	Before entering medical school	cigarette	Smoke every day (go to Number 7-1)	10			Yes	Currently, I have no intention of quitting smoking at all.	Yes	Yes	Yes	30	10000	호흡기질환 순환기질환	Yes	2	까먹음	니코틴패치	10	Yes	2
2016-12-14 15:30:59	M	25	P	2	More than 100	2	cigarette	Smoked in the past, but not now (go to Number 7-3)			1년, 200개비			Yes	Yes	No	50	50만명	Lung cancer, COPD, 기관지염	Yes	4	5R	챔픽스, 바레니클린	2년	Yes	4
2016-12-14 15:31:31	M	25	P	2	More than 100	Yes과 1학년	cigarette	Smoke every day (go to Number 7-1)	6			Yes	Not within six months, but I plan to quit smoking someday.	Yes	Yes	Yes	0.3	50000	Lung cancer, 설암, Laryngeal cancer	Yes	3		naloxone	5	No	2
2016-12-14 15:34:21	M	27	P	1	Never smoked (go to number 10)									Yes	Yes	No	21		심근경색 , Lung cancer, Oropharyngeal cancer	Yes	3	ASK ASSESE ADVICE ASSSIGN ARRANGE	바레니클린 부프로피온 니코틴(껌, 사탕 패치)	5	Yes	3
2016-12-14 15:39:57	M	25	P	2	Never smoked (go to number 10)									Yes	Yes	Yes									Yes	3
2016-12-14 15:49:01	M	23	P	2	More than 100	Before entering medical school	cigarette Electronic cigarette	Smoke occasionally (go to Number 7-2)		14일, 3개비		No	Not within six months, but I plan to quit smoking someday.	Yes	Yes	Yes	모름	모름	Lung cancer 간암 Laryngeal cancer	Yes	3	모름	니코틴 패치	30년	Yes	2
2016-12-14 15:50:42	M	26	P	2	Never smoked (go to number 10)									Yes	Yes	Yes	50	500000	Lung cancer Laryngeal cancer Oropharyngeal cancer	Yes	4			5년	No	3
2016-12-14 16:07:27	M	28	P	2	Never smoked (go to number 10)				0			No		Yes	Yes	Yes	0.3	100만	폐 자궁경부 Esophageal cancer	Yes	1		니코틴 패치 금연초	20년	Yes	5
2016-12-14 17:01:16	M	23	P	1	Never smoked (go to number 10)									Yes	Yes	Yes				Yes	3				Yes	3
2016-12-14 17:21:13	M	27	P	3	Never smoked (go to number 10)									Yes	Yes	No	0.3	10만명	Lung cancer 무기폐 혈관질환	Yes	4				No	3
2016-12-14 17:21:20	M	34	P	3	Less than 100	Before entering medical school	cigarette	Smoked in the past, but not now (go to Number 7-3)			20개비			Yes	Yes	No	80	1000000	Lung cancer copd 폐결핵	Yes	1	모르겠습니다	항우울제	없다	No	1
2016-12-14 17:24:15	F	25	P	3	Never smoked (go to number 10)									No	Yes	Yes			Lung cancer 만성폐쇄성폐질환	Yes	3	Relevance,roadblock,reward,repetition,	챔픽스,		Yes	2
2016-12-14 17:26:09	M	26	P	3	More than 100	Before entering medical school	cigarette Electronic cigarette	Smoke every day (go to Number 7-1)	10			No	Not within six months, but I plan to quit smoking someday.	No	Yes	Yes	50	50000	Lung cancer 기관지암 Esophageal cancer	Yes	2	충고 조언	Electronic cigarette챔픽스 니코틴패치	10	No	4
2016-12-14 17:41:00	M	29	P	3	More than 100	Before entering medical school	cigarette	Smoked in the past, but not now (go to Number 7-3)			3년, 5개피, 1년			Yes	Yes	Yes	0.4	2만명	Lung cancer 인두암 COPD	Yes	2	risk, relevance, rewards, roadblocks, receptition	니코틴 껌/패치 항우울제 Varrnicline	10년	Yes	3
2016-12-14 17:58:19	M	26	P	3	Never smoked (go to number 10)				0			No		Yes	Yes	Yes	0.54	300000	Lung cancer, 폐렴, COPD	Yes	2	Risk reward roadblock repetition	Bupripion	5	Yes	1
2016-12-14 18:19:15	M	26	P	2	More than 100	Before entering medical school	cigarette Electronic cigarette무연담배(스누스, 스너프, 씹는 담배 등) Hookah 말아 피우는 담배	Smoke every day (go to Number 7-1)	20			No	Currently, I have no intention of quitting smoking at all.	Yes	Yes	Yes	0.6
2016-12-14 18:47:04	F	24	P	3	Never smoked (go to number 10)									No	Yes	No	0.3		Lung cancer Oropharyngeal cancer	Yes	3	Ask assess advise assist arrange	Varenicline	평생	Yes	2
2016-12-14 20:15:42	F	23	K	1	Never smoked (go to number 10)									Yes	Yes	No	56	600	Lung cancer Esophageal cancer	Yes	3			20	Yes	1
2016-12-14 20:35:47	M	31	P	3	Never smoked (go to number 10)									Yes	Yes	Yes	0.4	100000	Lung cancer, COPD, 뇌혈관질환	Yes	4	5R, Reward, Roadblock, Repeat, Risk	champix, naloxone, buspirone	20년		2
2016-12-15 10:19:01	F	27	D	4	Never smoked (go to number 10)									No	No	Yes	30?	모름	Lung cancer 세기관지염 만성폐쇄성폐질환	Yes	2		바레니클린 부프로피온		Yes	1
2016-12-15 13:52:31	M	22	K	1	Never smoked (go to number 10)				0			No		Yes	Yes	No	?	?	기억이 안납니다 Lung cancer	Yes	3	?	Electronic cigarette니코틴 껌	?	Yes	1
2016-12-15 17:15:49	M	22	K	1	Never smoked (go to number 10)									No	Yes	No			Lung cancer Laryngeal cancer 설암	Yes	3				No	2
2016-12-16 14:14:40	M	23	I	4	Never smoked (go to number 10)									Yes	Yes	Yes	0.4	500000	1. Lung cancer 2. COPD 3. 방광암	Yes	4	1. Ask 2. Assess 3. Advise 4. Assist 5. Arrange	바레니클린 부프로피온 니코틴패치	20	Yes	4
2016-12-16 14:21:18	M	27	I	4	More than 100	1	cigarette 말아 피우는 담배	Smoke every day (go to Number 7-1)	20			Yes	I plan to quit smoking within 6 months.	No	Yes	Yes	40	20000	copd lung ca. burger's dz. stroke angina MI dyslipidemia	No	3			5	Yes	3
2016-12-16 14:22:34	F	24	I	4	Never smoked (go to number 10)									Yes	Yes	Yes	25	40000명	Lung cancer, Esophageal cancer, 방광암	Yes	4	ask, assess, advise, assist, arrange	바레니클린, 니코틴껌, 니코틴패치	5면	No	4
2016-12-16 14:22:40	F	24	I	4	Never smoked (go to number 10)									No	Yes	Yes	0.4	1000	Lung cancer 위암 Esophageal cancer	Yes	4	ask assess advise assist arrange	니코틴패치 varenicline	15년	Yes	4
2016-12-16 14:23:33	M	25	I	4	More than 100	Before entering medical school	cigarette	Smoke occasionally (go to Number 7-2)		10일, 3개비		No	Not within six months, but I plan to quit smoking someday.	Yes	Yes	Yes	40	10만명당 30명?	Lung cancer 만성폐쇄성폐질환 Laryngeal cancer 방광암	Yes	5	Ask Assess Advice Assist Arrange	챔픽스, 웰부트린, 니코피온	10년	Yes	4
2016-12-16 14:23:45	M	24	I	4	Never smoked (go to number 10)				0					Yes	Yes	Yes	25	10만	페암, Esophageal cancer, 방광암	Yes	4	Ask Assess Advise Assist Arrange	바레니클레인, 니코틴패치,	15년	No	3
2016-12-16 14:23:47	M	27	I	4	Never smoked (go to number 10)									Yes	Yes	No	30	3000	Lung cancer 만성폐쇄성기관지염 방광암	Yes	5		디설프람 날프록손	30	Yes	4
2016-12-16 14:23:49	F	24	I	4	Never smoked (go to number 10)				0					Yes	Yes	Yes	0.4	1000	Lung cancer COPD 비인두암	Yes	5	고려전단계 고려단계 준비단계 시행단계 유지단계	부프로피온 바레니클린 니코틴패치	20년	Yes	3
2016-12-16 14:24:40	M	23	I	4	Never smoked (go to number 10)									Yes	Yes	Yes	0.2	50000	Lung cancer 방광암 Laryngeal cancer	Yes	3		바레니클린 니코틴 부프로피온	10년	Yes	4
2016-12-16 14:25:15	F	25	I	4	Never smoked (go to number 10)									Yes	Yes	Yes	40?	10만명?	Lung cancer COPD 치아변색	Yes	4	5A ...assess, assist	바레니클린 부프로피온 니코틴패치/껌	20년	No	3
2016-12-16 14:37:36	F	25	I	4	Never smoked (go to number 10)									No	Yes	Yes	???90?	40000000	Lung cancer copd 방광암 신장암 Oropharyngeal cancer Esophageal cancer	Yes	2	5R	바레니클린 부프로피온 니코틴대체제	10	No	3
2016-12-16 14:47:06	F	25	I	4	Never smoked (go to number 10)									Yes	No	Yes	0.35	75000명	Lung cancer Laryngeal cancer COPD	Yes	3	Ask Assess Advice Assist Arrangement	바레니클린 부프로피온 니코틴대치요법	5년	Yes	4
2016-12-16 14:50:28	F	22	I	2	Never smoked (go to number 10)									No	Yes	Yes	0.3	2000000	Lung cancer, Esophageal cancer, 치아질환	No	4	계획전, 계획, 준비, 실행, 유지	바레니클린, 부프로피온	1년	No	2
2016-12-16 14:52:08	M	25	I	4	More than 100	Before entering medical school	cigarette	Smoked in the past, but not now (go to Number 7-3)			5년, 10개비, 6개월			Yes	Yes	Yes	모름	모름	Lung cancer 만성폐쇄성폐질환 심질환	No	5	현재건강상태알리기 위험 알리고 금연 전략 용기 북돋기 다음계획잡기	Varenicline Bupropione	10년 15년	Yes	5
2016-12-16 14:55:35	M	22	I	2	Less than 100	1	cigarette	Smoked in the past, but not now (go to Number 7-3)			평생 12개비			Yes	Yes	Yes	40	5만?	COPD asthma Lung cancer	Yes	4	Ask advise assess assist arrange-f/u	NRT Electronic cigarette금연초	10	Yes	2
2016-12-16 14:57:43	F	22	I	1	Never smoked (go to number 10)							No		Yes	Yes	No	50	5000000	심혈관계 질환 각종 암 폐질환	Yes	2	Ask Advice Assess Assist Arrange	NPT 샴픽스 보투리온	10	Yes	3
2016-12-16 14:58:07	M	22	I	1	More than 100	Before entering medical school	cigarette	Smoke every day (go to Number 7-1)	20			No	Not within six months, but I plan to quit smoking someday.	Yes	Yes	Yes	0.4	잘 모르겠습니다	Lung cancer, COPD, UIP	Yes	4	ask, advise, assess, assist, areangement	니코틴패치	5년	No	2
2016-12-16 14:58:35	F	21	I	1	Never smoked (go to number 10)				0			No		Yes	Yes	Yes	20	50만명	Lung cancer dip rbild	Yes	5	ask assist assess ...	챔픽스 이부프로펜 니코틴패치	1년	Yes	4
2016-12-16 14:59:01	F	21	I	1	Never smoked (go to number 10)									No	Yes	Yes	0.48	10000?	Lung cancer 심장병 Stroke	Yes	4	assess assist..	니코틴껌 니코틴패치	25년	Yes	2
2016-12-16 15:03:20	F	21	I	1	Never smoked (go to number 10)									Yes	Yes	Yes	0.45	6000000명	Lung cancer Laryngeal cancer COPD	Yes	4	Ask Advise Assess Assist Arrange	NRT(니코틴 껌,,) 부프로피놀	20갑년	Yes	4
2016-12-16 15:03:27	M	21	I	1	Never smoked (go to number 10)				0			No		Yes	Yes	Yes	약 30%	약 8만명	COPD, Lung Cancer, DIP 등	Yes	4	ask about tobacco use advise to quit assess willingness to make a quit attempt assit in quit attempt arrange follow-ups	니코틴 패치, 사탕 등; bupropion; vareniline	20	Yes	2
2016-12-16 15:03:31	F	26	I	4	More than 100	Yes과 1학년	cigarette	Smoke occasionally (go to Number 7-2)		7일 5개비		Yes	1개월 안에 금연할 계획이 있다.	Yes	Yes	No	20	200	Copd lungcancer asthma	Yes	3	5 r relevance rewards risk roadblock repitition	바레니클린 부프로피옴 부스피론	20	Yes	4
2016-12-16 15:05:25	M	23	I	2	Never smoked (go to number 10)									Yes	Yes	Yes	0.3	2만명	COPD Bronchitis Bladder cancer	Yes	3		니코틴 제제	2,3년	Yes	2
2016-12-16 15:07:15	M	26	I	2	Never smoked (go to number 10)				0			No		Yes	Yes	Yes	30			Yes	3		부프로피온 날록손		Yes	2
2016-12-16 15:07:59	M	24	I	4	Never smoked (go to number 10)									No	Yes	Yes	30	10000	Lung cancer, Esophageal cancer, 방광암	Yes	4		니코틴 패치, 바레니클린, 부프로피온	시작한 직후	Yes	3
2016-12-16 15:10:07	M	23	I	2	Never smoked (go to number 10)									Yes	Yes	Yes	0.4	아몰랑	Copd ILD Lung cancer	Yes	5			5	Yes	3
2016-12-16 15:18:34	M	24	I	3	Less than 100									Yes	Yes	Yes				Yes	3				No	4
2016-12-16 15:19:01	M	22	I	3	Never smoked (go to number 10)									Yes	Yes	Yes	30	5만명	Lung cancer COPD Laryngeal cancer	Yes	3	Ask A A A Arrange	부프로피온 니코틴패치	5년	Yes	2
2016-12-16 15:20:00	F	24	I	3	Never smoked (go to number 10)									Yes	Yes	Yes	20	10000	Lung cancer COPD Colon cancer	Yes		비용 효과 방해요인 반복 계획	니코틴패치 부프로피온	10	Yes	3
2016-12-16 15:20:44	M	21	I	2	Never smoked (go to number 10)				0					Yes	Yes	Yes	30		COPD MI Lung cancer	Yes	4		니코틴 패치 니코틴껌 부프로피온?	10	Yes	3
2016-12-16 15:20:46	M	23	I	2	Less than 100	Before entering medical school	cigarette	Smoked in the past, but not now (go to Number 7-3)			1년 5개비 8년			Yes	Yes	Yes	20	3만	artherosclerosis Lung cancer Laryngeal cancer	Yes	5		니코틴패치	5년	Yes	2
2016-12-16 15:22:24	M	22	D	3	Never smoked (go to number 10)	Yes과 2학년	cigarette	Smoke every day (go to Number 7-1)	18			No	Not within six months, but I plan to quit smoking someday.	Yes	Yes	Yes	0.24	6만명	만성폐쇄성폐질환 소세포Lung cancer 관상동맥질환	Yes	4	Ask assess advise assist arrange	바레니클린 부프로피온 니코틴 패치	15년	Yes	1
2016-12-16 15:23:07	M	24	I	3	Never smoked (go to number 10)									Yes	Yes	Yes	0.4	50,000명	Small cell lung cancer COPD Stroke	Yes	2	Ask Assess Advice Assist Arrange	니코틴 껌 니코틴 패치 바레니클린	2	Yes	2
2016-12-16 15:23:55	M	21	I	1	Never smoked (go to number 10)									Yes	Yes	Yes	43	500000	Copd Lung cancer	No	4	Ask Advise Assess A Appointment	니코틴 대체 요법,		Yes	2
2016-12-16 15:23:55	F	25	I	3	Never smoked (go to number 10)									Yes	Yes	Yes	10	10만명	Lung cancer 심혈관계질환 COPD	Yes	2	준비	부프로피온 BDZ	10	Yes	2
2016-12-16 15:23:59	F	23	I	3										Yes	Yes	Yes	15	200	Lung cancer Oropharyngeal cancer 만성폐쇄성폐질환	Yes	5	준비전단계 준비단계 계획단계 실천단계 유지단계	1. 니코틴패치 2. 부프로피온 3. 벤조디아제핀	10	No	4
2016-12-16 15:25:05	M	25	I	3	Never smoked (go to number 10)									Yes	Yes	Yes	30	300	COPD	Yes	3		부프로피온 니코틴패치	10	No	2
2016-12-16 15:25:37	F	25	I	3	Never smoked (go to number 10)									Yes	Yes	Yes			Lung cancer Esophageal cancer	Yes	4			10	Yes	3
2016-12-16 15:26:40	M	21	I	1	Less than 100	Yes과 1학년	말아 피우는 담배	Smoked in the past, but not now (go to Number 7-3)			살면서 10개비정도 펴봤음			Yes	Yes	Yes	20	100만명	암, 고혈압, COPD	Yes	5		니코틴 보조제	10	No	4
2016-12-16 15:27:56	F	21	I	1	Never smoked (go to number 10)									Yes	Yes	Yes	20	25만명	Lung cancer, emphysema, chronic bronchitis	No	4	Ask assess assist approach	니코틴	10년이상	Yes	3
2016-12-16 15:28:17	F	23	I	3	Never smoked (go to number 10)									Yes	Yes	Yes	0.2	1천명	Lung cancer copd	Yes	2				Yes	1
2016-12-16 15:28:21	F	21	I	1	Never smoked (go to number 10)									Yes	Yes	Yes	43	300만명	UIP DIP COPD	Yes	5	5A Ask advise assess assist arrange	니코틴패치 부프로피온 바레니클린	30년	Yes	3
2016-12-16 15:28:33	F	24	I	2	Never smoked (go to number 10)									Yes	Yes	Yes	30	만명...?	Lung cancer 관상동맥질환 버거씨병	Yes	4				No	1
2016-12-16 15:30:22	M	24	I	1	Never smoked (go to number 10)									Yes	Yes	Yes	43	50만	Lung cancer. copd. Laryngeal cancer	Yes	4			10년	Yes	3
2016-12-16 15:31:58	F	21	I	1	Never smoked (go to number 10)									Yes	Yes	Yes	30	30000	lung cancer COPD DIP	Yes	5	ask advise assess assist arrange	니코틴대체요법 바레니클린	30년	Yes	3
2016-12-16 15:34:04	F	20	I	1	Never smoked (go to number 10)									Yes	Yes	Yes	0.3	10만명	COPD DIP RBILD	Yes	5	Ask Advise Assess Assist Arrange	니코틴패치 Bupropion Varenicline	30년	Yes	3
2016-12-16 15:36:05	M	22	I	1	Never smoked (go to number 10)								Currently, I have no intention of quitting smoking at all.	Yes	Yes	Yes	30	1000000	Lung cancer, MI, Stroke	Yes	4	Ask advice assess a	니코틴 패치, 항우울제	5년	Yes	2
2016-12-16 15:38:55	M	22	I	2	More than 100	Before entering medical school	cigarette Electronic cigarette	Smoke every day (go to Number 7-1)	10			Yes	1개월 안에 금연할 계획이 있다.	Yes	Yes	Yes	40	50000	Lung cancer Laryngeal cancer 폐기종	Yes	4	Ask Advise Assess Assist Arrange	부프로피온 바레니클린 니코틴패치	15	Yes	4
2016-12-16 15:45:23	F	20	I	1	Never smoked (go to number 10)									Yes	Yes	Yes	23퍼센트 정도	300	Lung cancer 급성관상동맥증후군 폐색전증	Yes	4	Ask Advise Assess Assist Arrange	니코틴패치 등 니코틴대체제 바레니클린 부프로피온	10	Yes	2
2016-12-16 15:52:22	M	21	I	1	Less than 100	Yes과 2학년		Smoked in the past, but not now (go to Number 7-3)						Yes	Yes	Yes				Yes	4				Yes	3
2016-12-16 15:56:32	F	21	I	1	Never smoked (go to number 10)									No	Yes	Yes	43	30만명	Lung cancer COPD IIP, DIP, RB-ILD LCH, AEP	Yes	3	Ask Assess Advise Assist Arrange A	NRT Bupuripion Valenicline	30년	Yes	2
2016-12-16 15:56:56	M	22	I	1	Never smoked (go to number 10)				0					Yes	Yes	Yes	30		Lung cancer,뇌혈관질환,심장질환	Yes	3	Ask advice assess assist arrange	니코틴 부프로피온 바레니클린	10	Yes	4
2016-12-16 16:04:22	M	22	I	1	Never smoked (go to number 10)	Yes과 1학년			0			No		Yes	Yes	Yes	30	10000	COPD lung cancer 심혈관계질환	Yes	3			안됨	Yes	3
2016-12-16 16:09:51	M	23	I	3	Never smoked (go to number 10)									No	Yes	Yes	0.3	5만명	Lung cancer COPD ILD	Yes	3	Ask - 금연의지가있는지물어본다 Assess - 금연할생각이있는지평가 Advice - 맞춤전략제시 Assist - 도와준다 Arrange - 추적관찰	바레니클린 부프라피온 니코틴패치	10년	Yes	3
2016-12-16 16:16:06	F	28	I	3	Never smoked (go to number 10)							No		Yes	Yes	Yes	0.3	10000	Lung cancer Laryngeal cancer COPD	No	4	고려전단계 고려단계 계획수립 금연시도	부프로피온, 니코틴패치	10년	Yes	3
2016-12-16 16:24:14	F	21	I	1	Never smoked (go to number 10)				0			No		Yes	Yes	Yes				Yes	5				Yes	1
2016-12-16 16:33:49	F	22	I	1	Never smoked (go to number 10)									Yes	Yes	Yes	0.2	10000	Lung cancer, copd, DIP	Yes	4		니코틴패치	30	Yes	3
2016-12-16 17:25:24	M	27	I	4	Less than 100	3	cigarette	Smoked in the past, but not now (go to Number 7-3)			2년, 10개비, 1년			Yes	No	Yes	50	6000000	Lung cancer Esophageal cancer Angina/심근경색	Yes	4	Ask Advise Assess Assist Arrange	니코틴 대체 요법 부프로피온 바레니클린	15	Yes	2
2016-12-16 17:47:45	M	23	I	2	More than 100	Before entering medical school	cigarette	Smoked in the past, but not now (go to Number 7-3)			5년 25개비, 1년			Yes	Yes	Yes	50	300000	COPD, Lung cancer, GERD	Yes	5	의지? 금연 금연 유지 금연 성공	바레니클린 챔픽스	15	Yes	3
2016-12-16 19:52:55	M	24	I	2	Never smoked (go to number 10)									No	Yes	Yes	0.3	10만명	All illness	Yes	1	아 배웠는데 기억이..	이것도 배웠는데.. 니코틴패치, 검, 또 뭐였더라	3년	Yes	1
2016-12-16 20:08:59	F	23	I	4	Never smoked (go to number 10)									Yes	Yes	Yes			Lung cancer Laryngeal cancer Esophageal cancer	Yes	5	ask advise assess assist arrange	니코틴보충제 바레니클린 부프로피온	5년	Yes	3
2016-12-16 23:20:14	F	22	I	1	Never smoked (go to number 10)									Yes	Yes	Yes	0.3	5000	Lung cancer, ILD, Bronchiectasis	Yes	3	Ask, Advise, Assess, Assist, Arrange	니코틴 패치, 니코틴 껌, 사탕	20	Yes	2
2016-12-17 10:25:03	M	24	I	4	More than 100	Before entering medical school	cigarette	Smoke every day (go to Number 7-1)	13			Yes	Currently, I have no intention of quitting smoking at all.	Yes	Yes	Yes	0.226	60000	Lung cancer Laryngeal cancer Stroke	Yes	3	5r risk relavance rewards roadblocks repetition	챔픽스 니코틴 패치 니코틴 사탕	2	Yes	5
2016-12-17 17:22:59	F	22	I	1	Never smoked (go to number 10)				0					Yes	Yes	Yes	0.4	600만명	Lung cancer, 고혈압, COPD	Yes	4	ask Advice Assess Assist Arrange	니코틴 패치, 바레니클린	20년	Yes	2
2016-12-17 19:11:44	M	23	I	2	More than 100	Before entering medical school	cigarette	Smoked in the past, but not now (go to Number 7-3)			하루한갑 2년반			Yes	Yes	Yes	30	모름	COPD Lung cancer Oral cancer	Yes	4	Ask advise assess assist arrange	Nicotine replacement therapy Bupropion Varenicline	1년	Yes	2
2016-12-17 20:14:13	M	29	D	2	Never smoked (go to number 10)									Yes	No	No	36.2	약6만명	Stroke,copd,Laryngeal cancer	Yes	4	???	부프로피온	3	Yes	2
2016-12-17 20:22:09	M	24	D	2	Never smoked (go to number 10)									Yes	Yes	No	30	3000	copd Lung cancer Colon cancer	Yes	4			15	Yes	2
2016-12-17 20:45:36	M	23	D	2	Less than 100	2	cigarette	Smoked in the past, but not now (go to Number 7-3)						Yes	Yes	No	0.25	모르겠습니다	혈압상승 Lung cancer Laryngeal cancer	Yes	4	모르겠습니다	금연패치나 껌	모르겠습니다	Yes	3
2016-12-17 21:10:33	M	24	D	2	More than 100	1	cigarette	Smoke every day (go to Number 7-1)	8			Yes	I plan to quit smoking within 6 months.	Yes	Yes	No	20	100000	Lung cancer Oropharyngeal cancer 기관지염	Yes	3	모름	금연껌 금연패치	10년	Yes	1
2016-12-18 02:40:53	M	22	D	2	Never smoked (go to number 10)									Yes	Yes	No	30	10000	암, 천식, 뇌출혈	Yes	4		니코틴제, 항우울제	1년	Yes	2
2016-12-18 12:39:13	F	22	I	1	Never smoked (go to number 10)									Yes	Yes	Yes	40		Lung cancer copd 동맥경화	Yes	4	Ask advice assess assist arrange	NRT Bupropion Varenicline	10	No	4
2016-12-18 13:21:37	M	24	D	2	More than 100	Before entering medical school	cigarette	Smoke every day (go to Number 7-1)	5			Yes	Not within six months, but I plan to quit smoking someday.	Yes	Yes	No	30	300000	동맥경화 Oropharyngeal cancer Lung cancer	Yes	4		금연초 니코틴패치 니코틴껌	10	Yes	4
2016-12-18 20:05:33	F	22	I	1	Never smoked (go to number 10)									Yes	Yes	Yes	43.7	30000	lung cancer, DIP, RB-ILD, LCH, COPD, AEP	Yes	4	Ask Advise Assess Assist Arrange	니코틴 부프로피온 바레니클린	20	Yes	3
